# Supplementary material for: EUPollMap: The European atlas of contemporary pollen distribution maps derived from an integrated Kriging interpolation approach
Source: Copernicus journal article supplement (doi:10.5194/essd-2022-364), 2023-02-08

Oriani et al., EUPollMap: The European atlas of contemporary pollen distribution maps derived from an integrated Kriging interpolation approach – **Supplemental material 2 : Examples of pollen maps from the EUPollMap dataset with the associated variogram model**

a) Abies - Occurrence probability (Kriging mean)

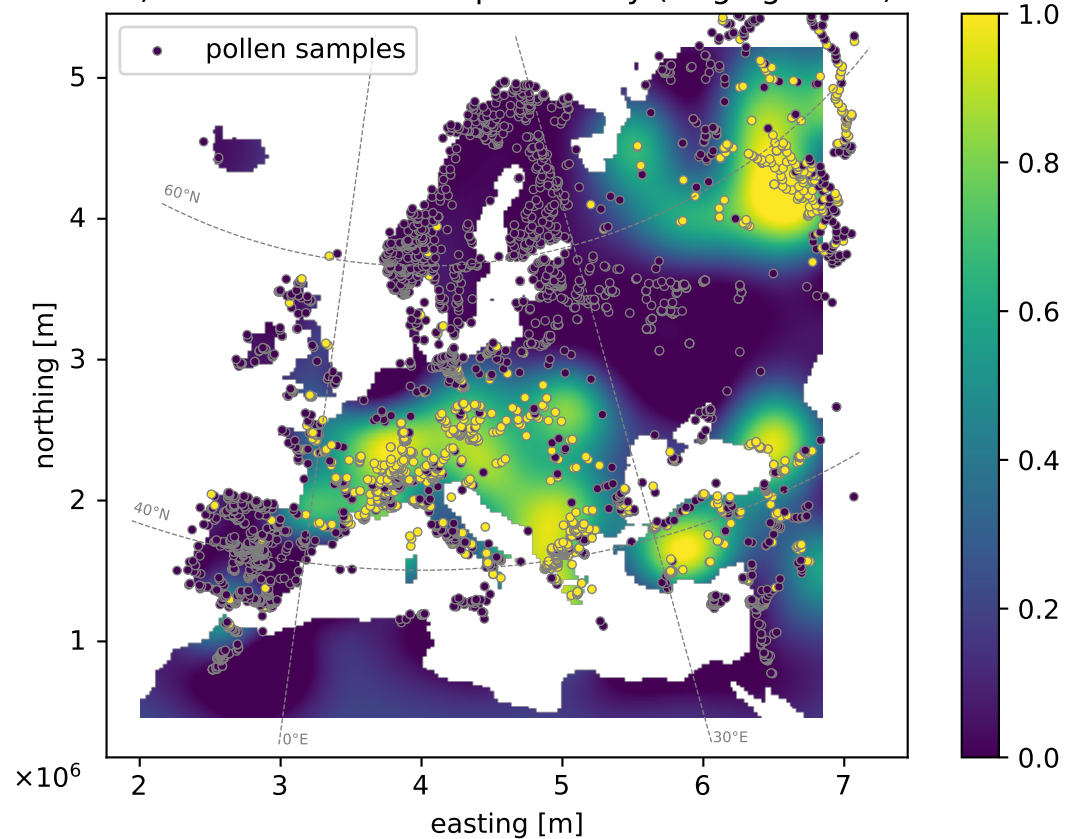

b) Abies - Variogram

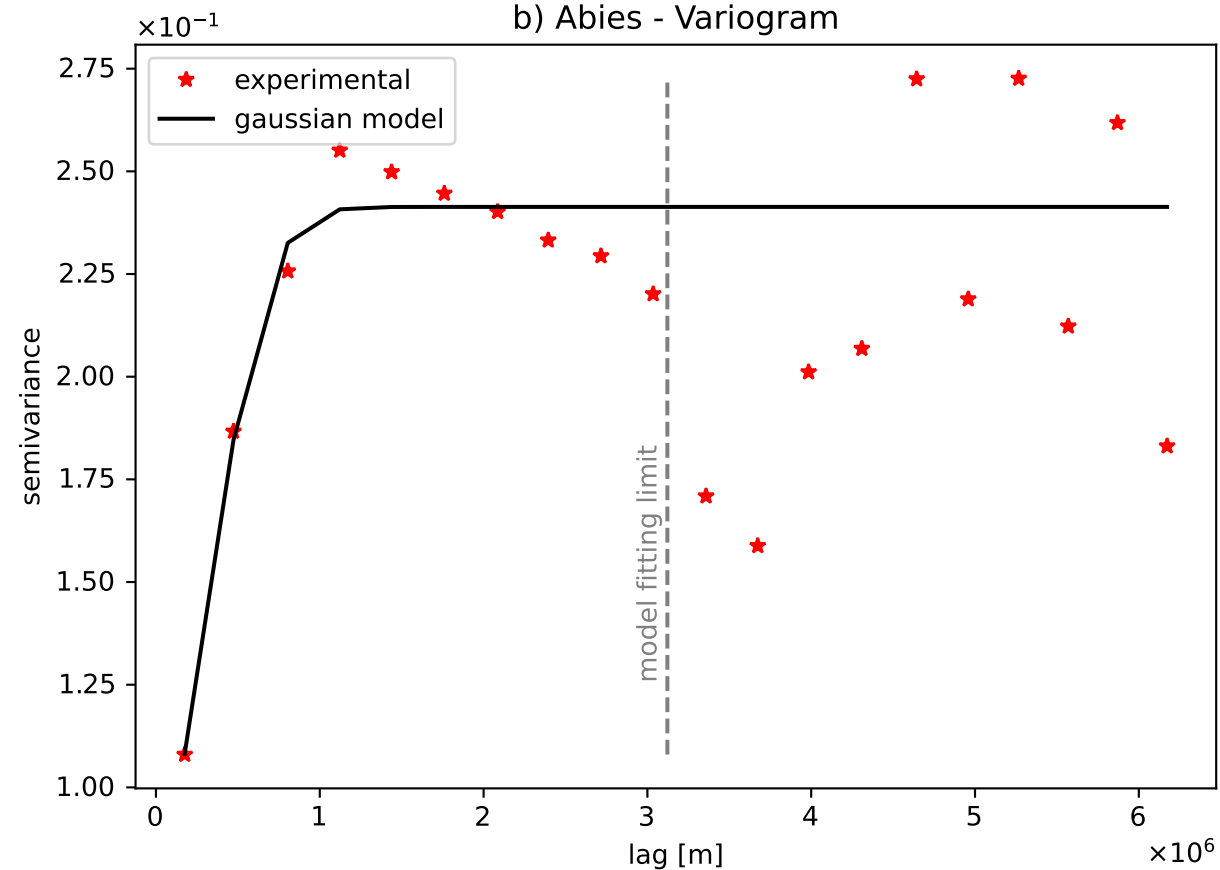

c) Abies - Occurrence map (probability thresholds)

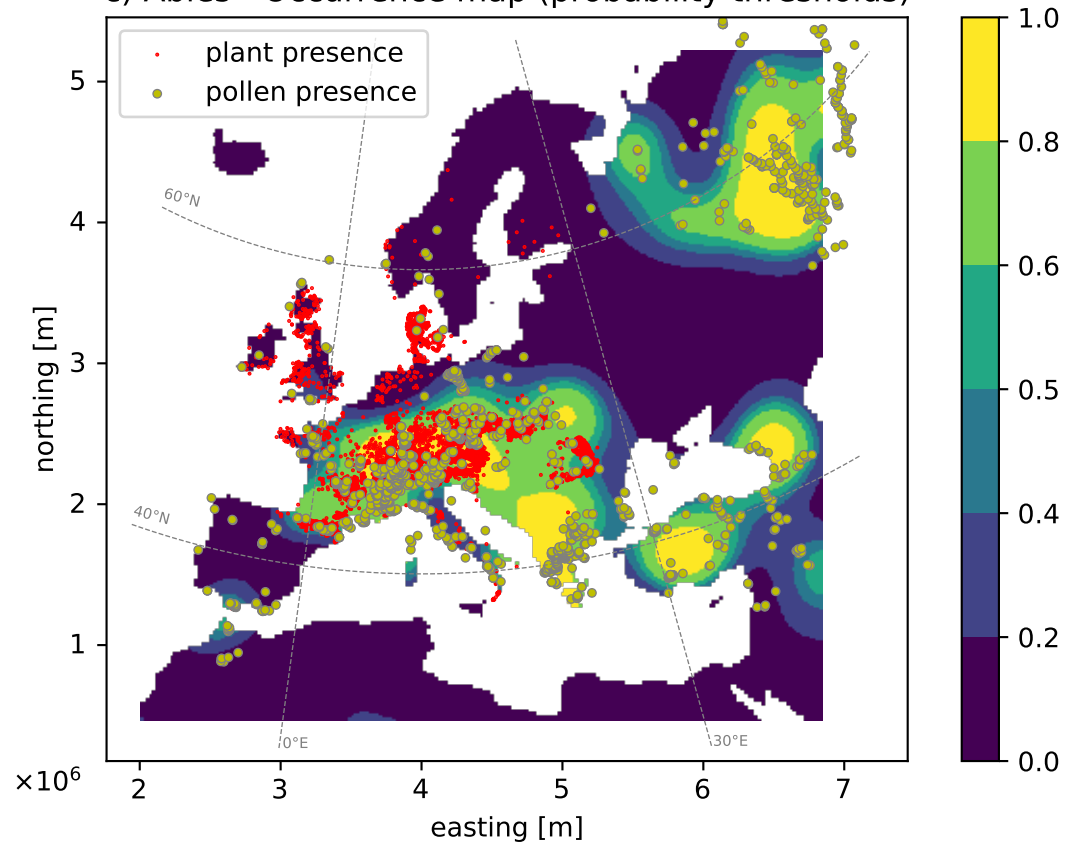

d) Abies - Occurrence uncertainty (Kriging variance)

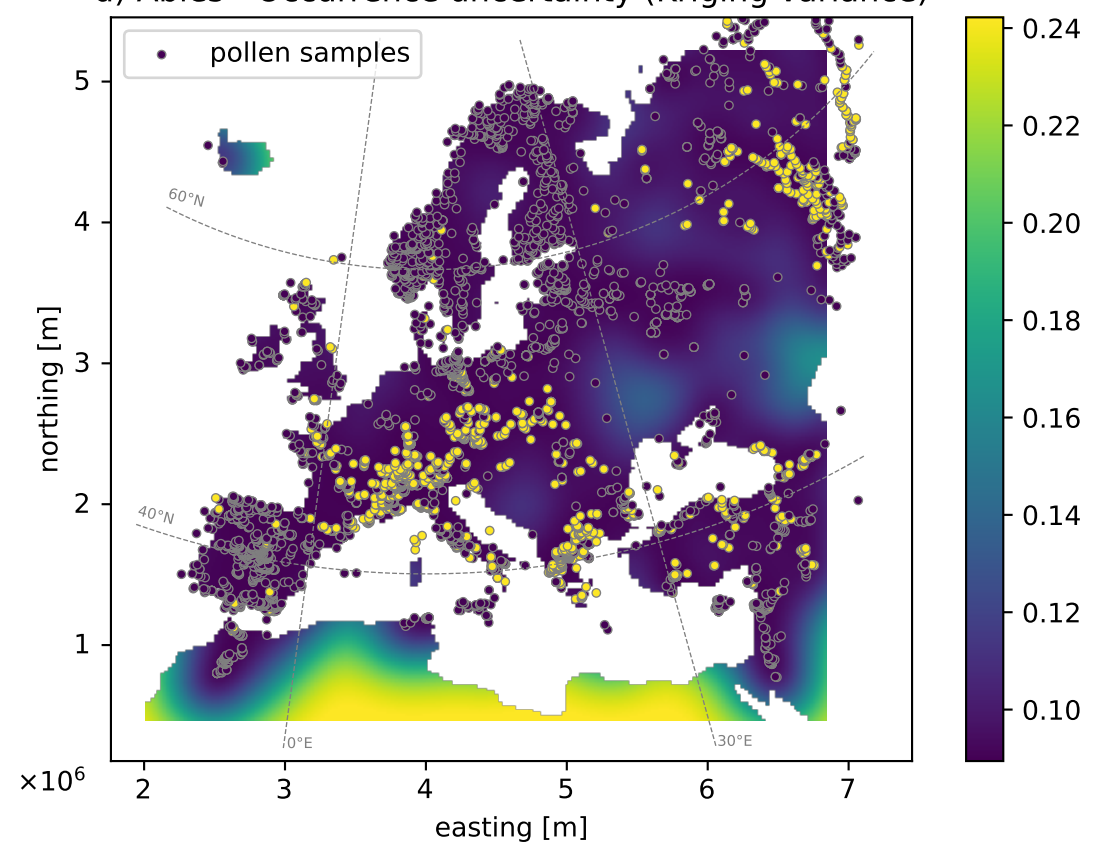

a) Betula - Occurrence probability (Kriging mean)

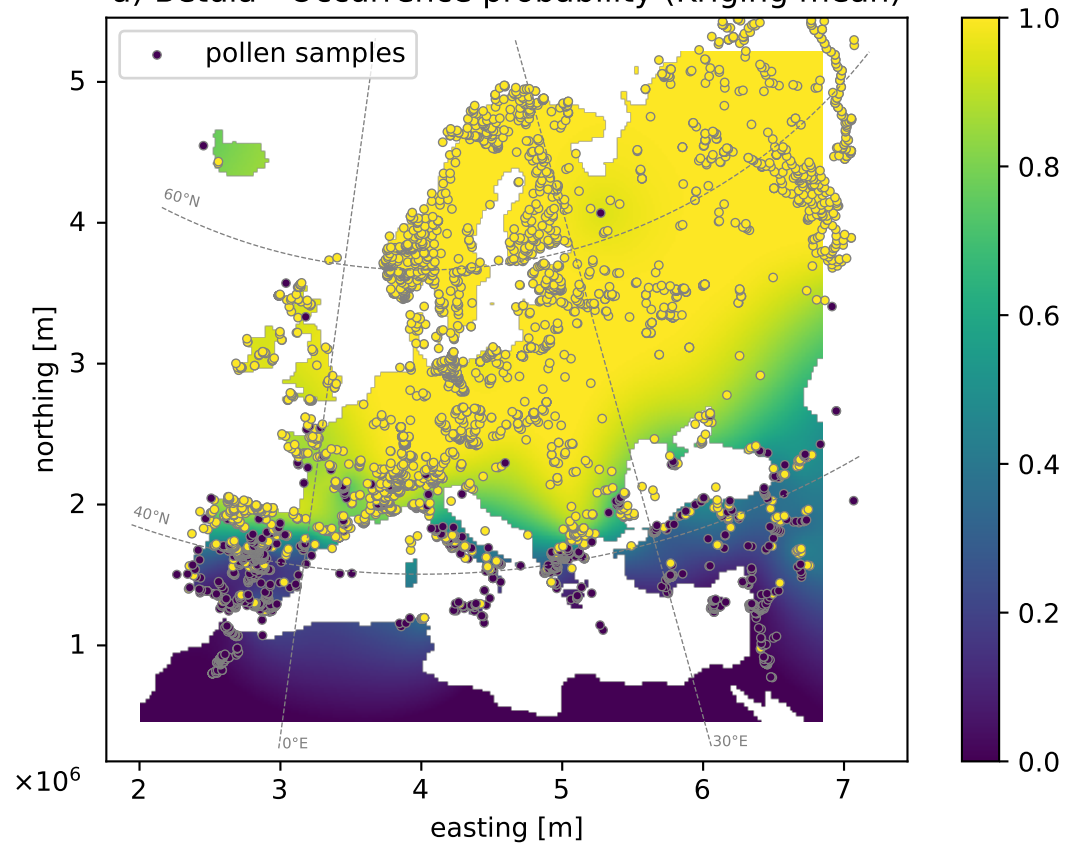

b) Betula - Variogram

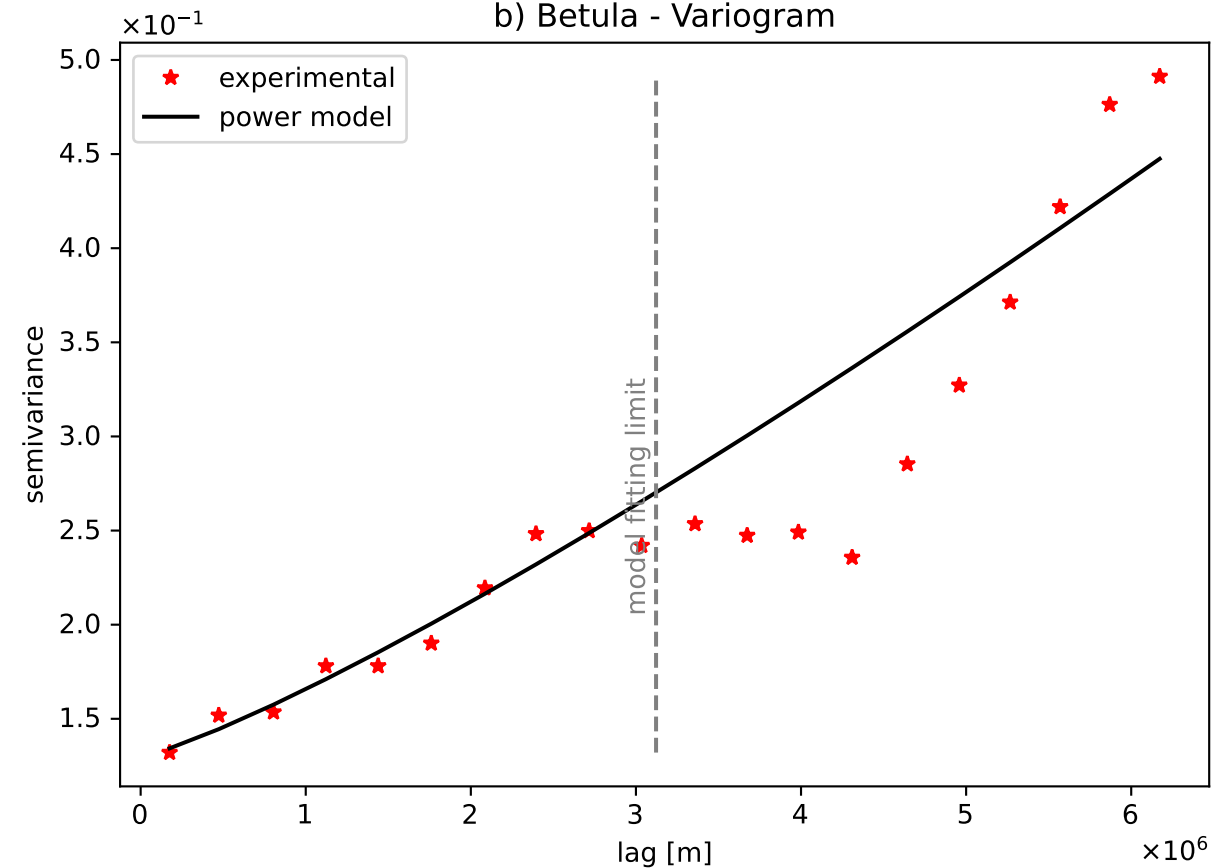

c) Betula - Occurrence map (probability thresholds)

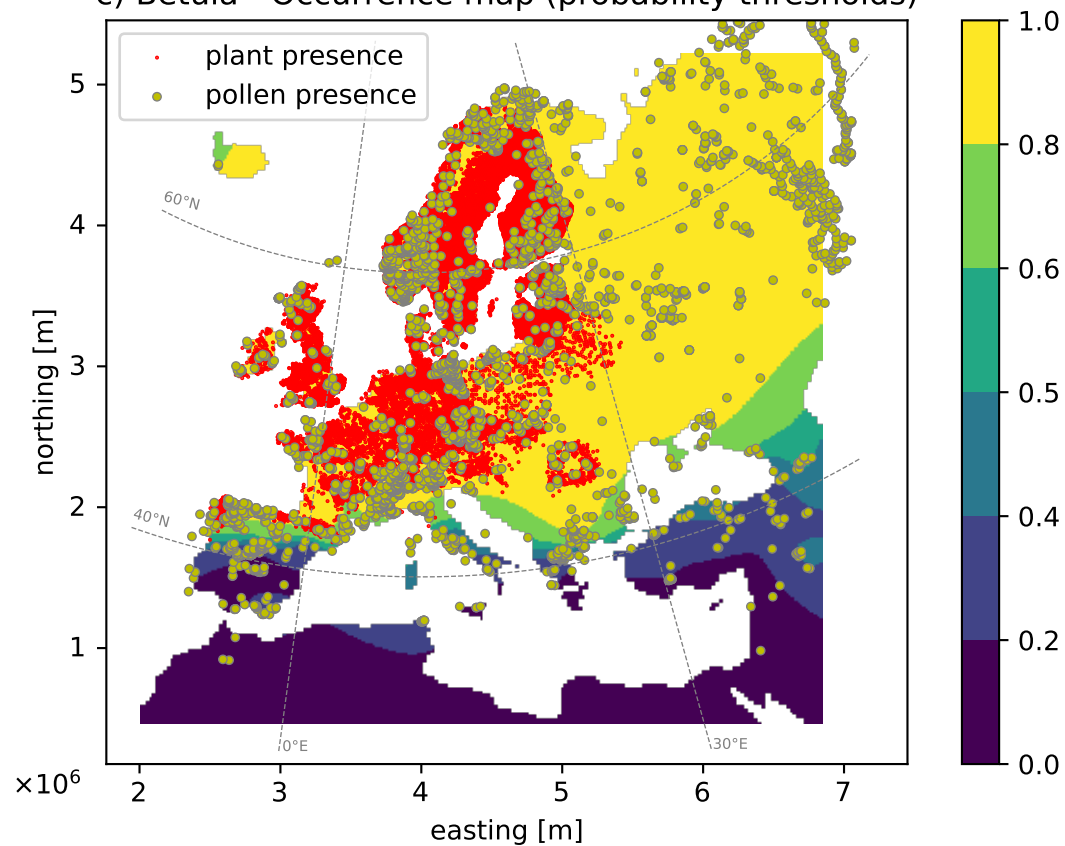

d) Betula - Occurrence uncertainty (Kriging variance)

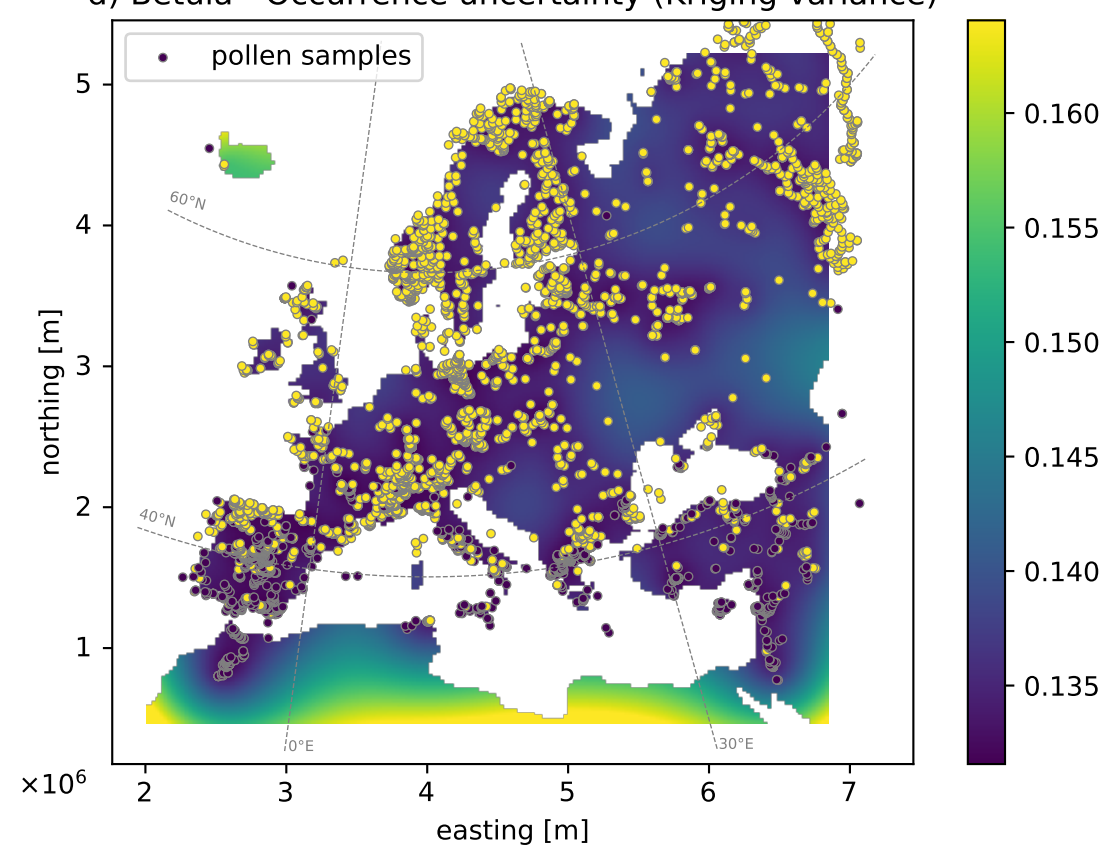

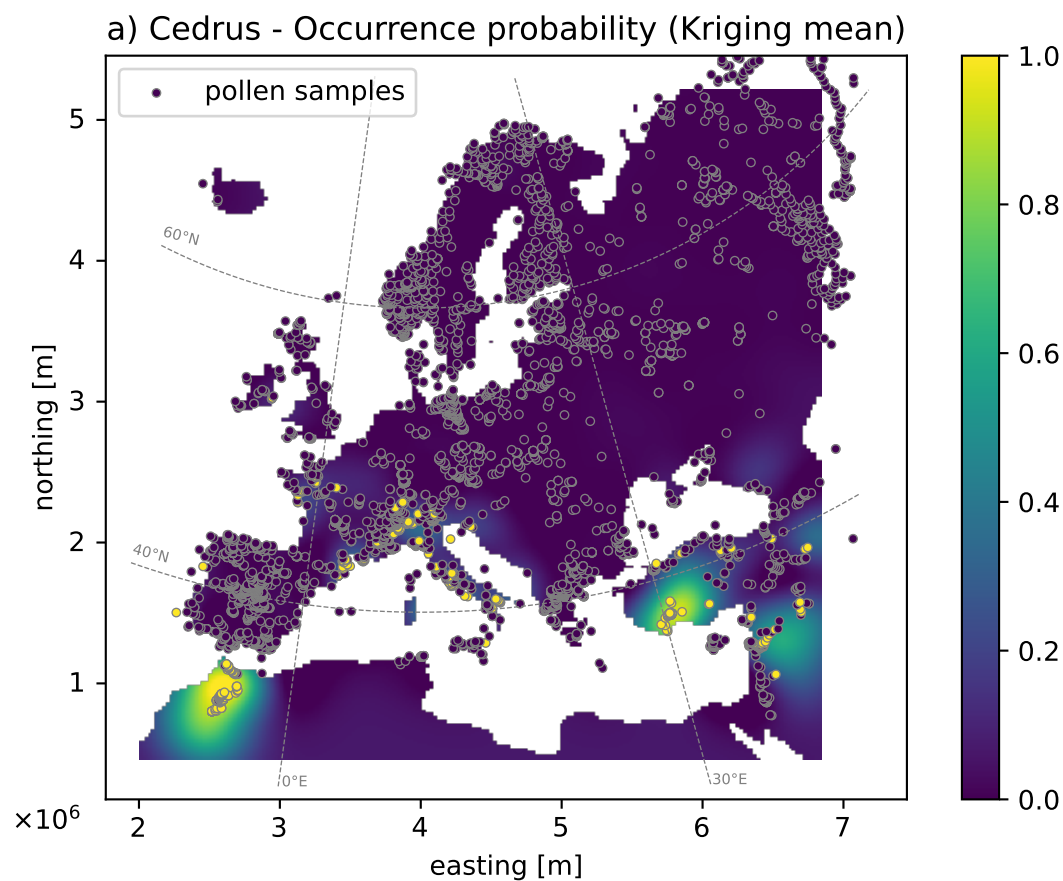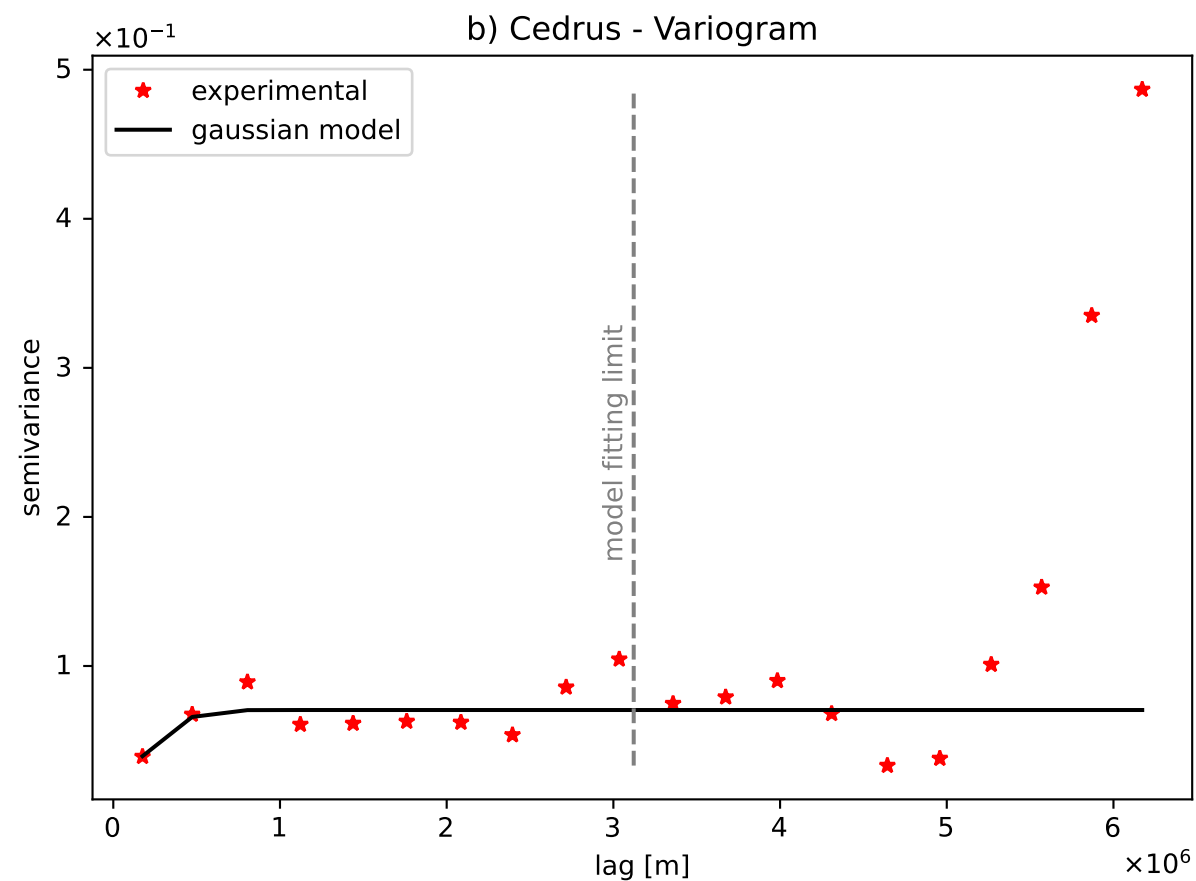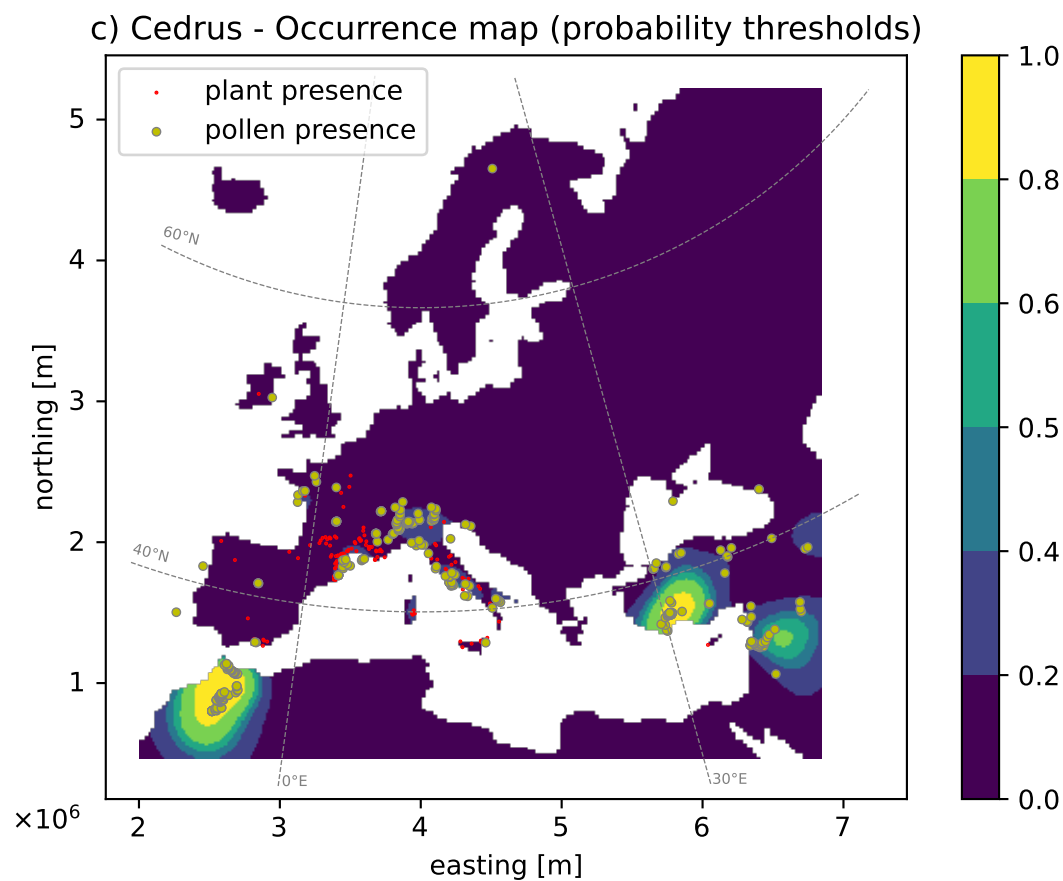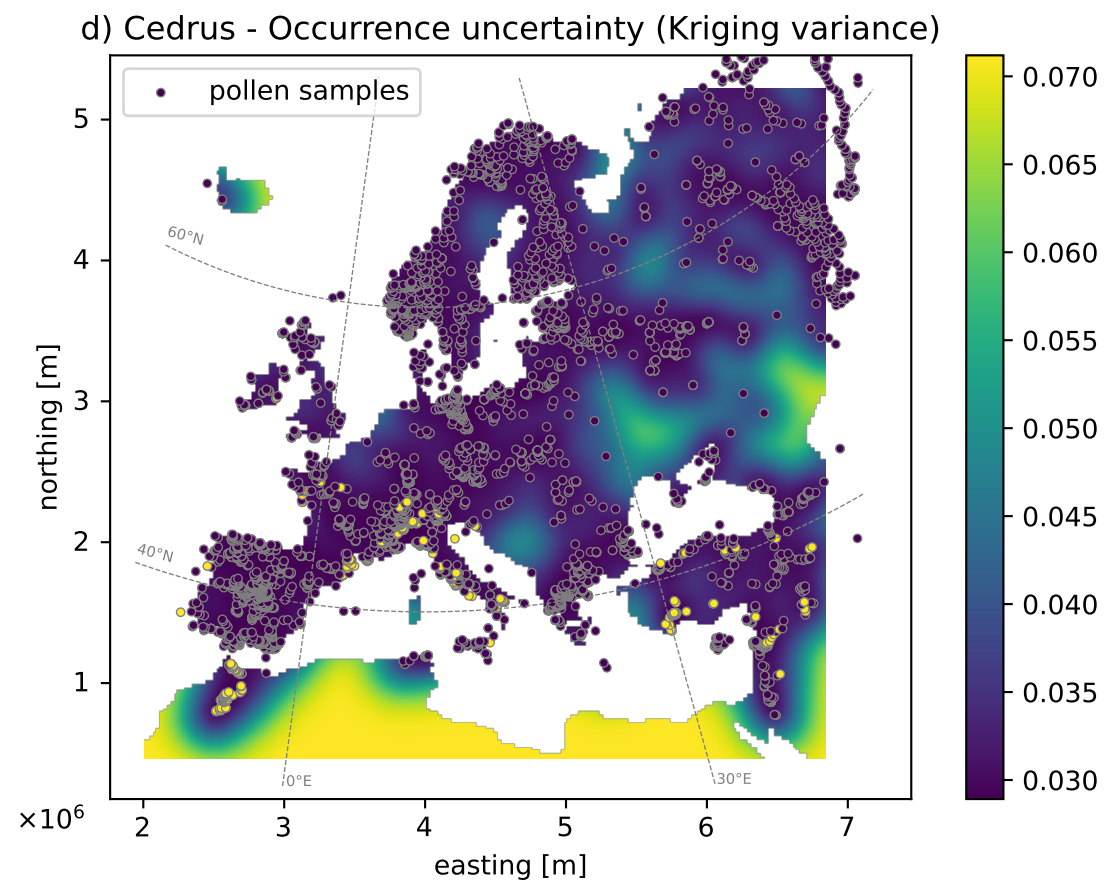



a) Corylus - Occurrence probability (Kriging mean)

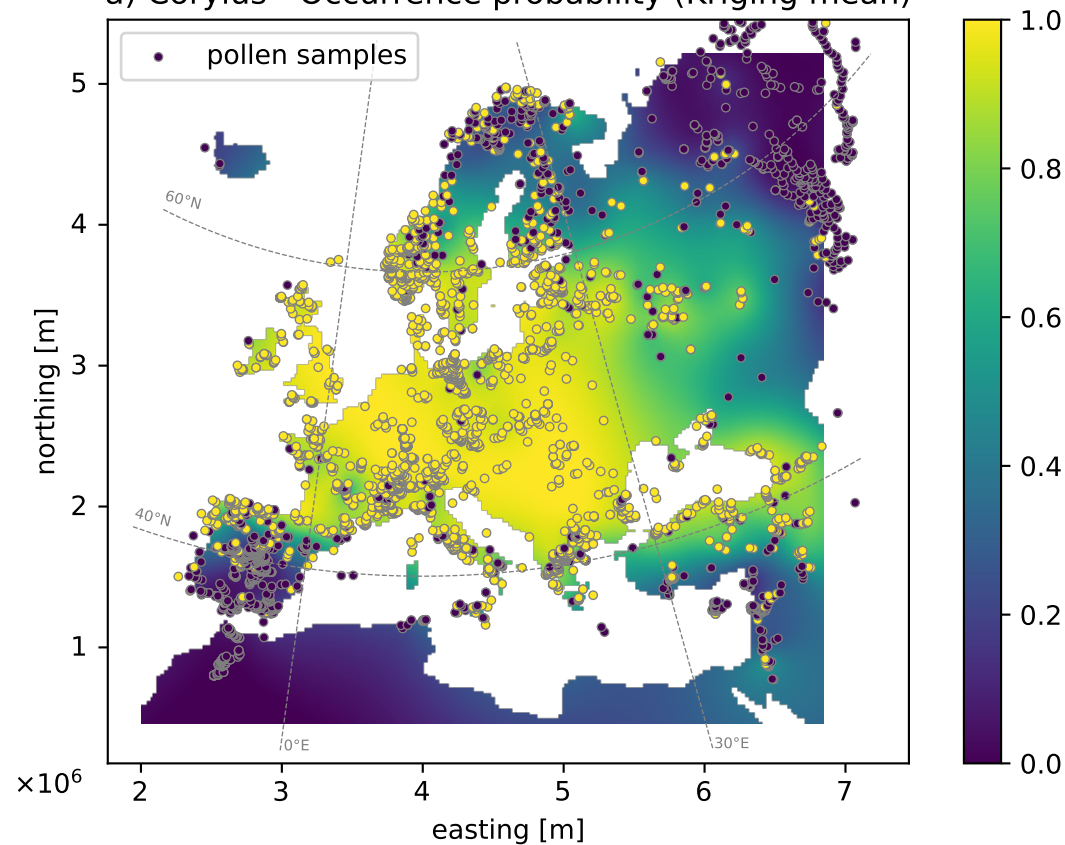

b) Corylus - Variogram

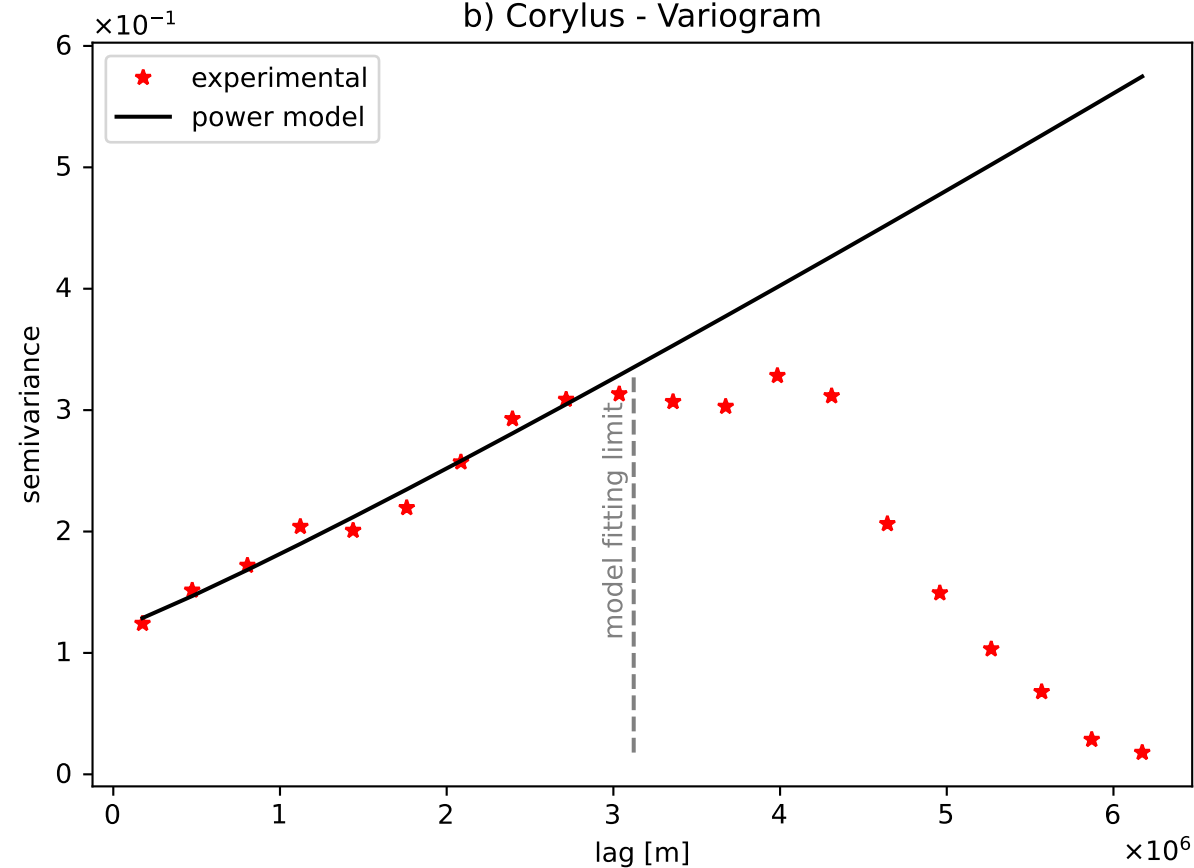

c) Corylus - Occurrence map (probability thresholds)

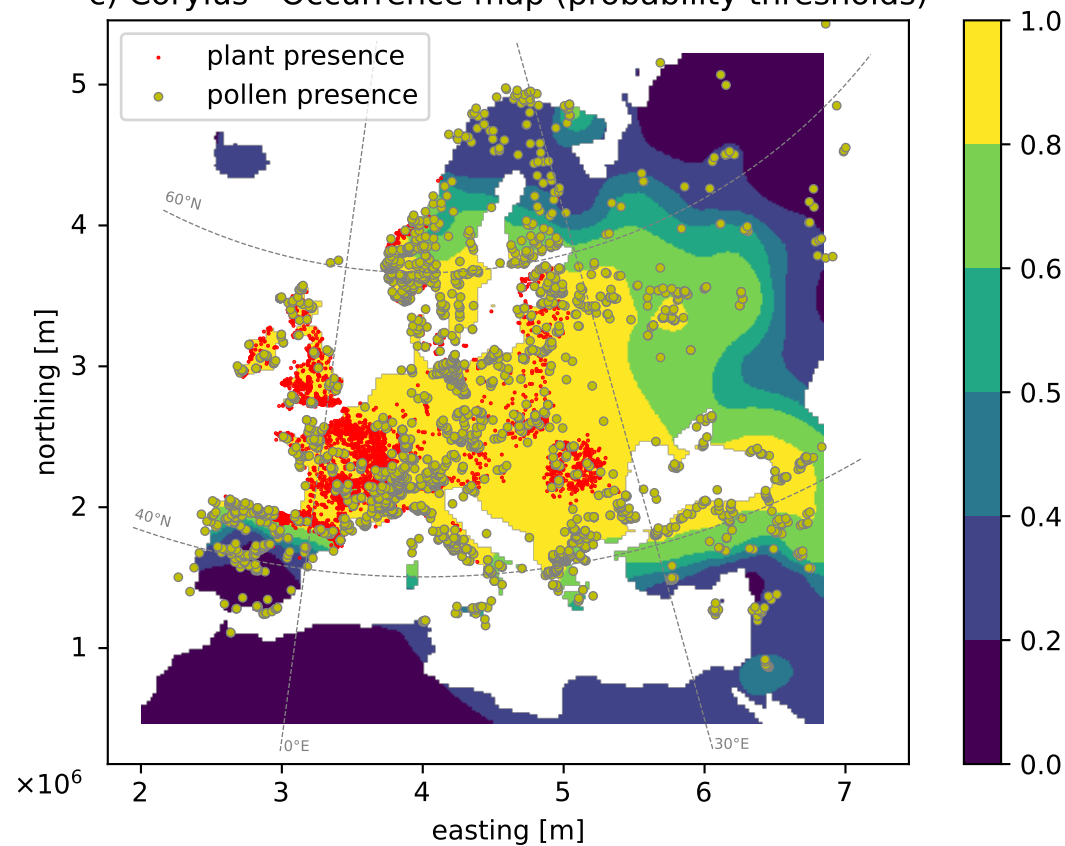

d) Corylus - Occurrence uncertainty (Kriging variance)

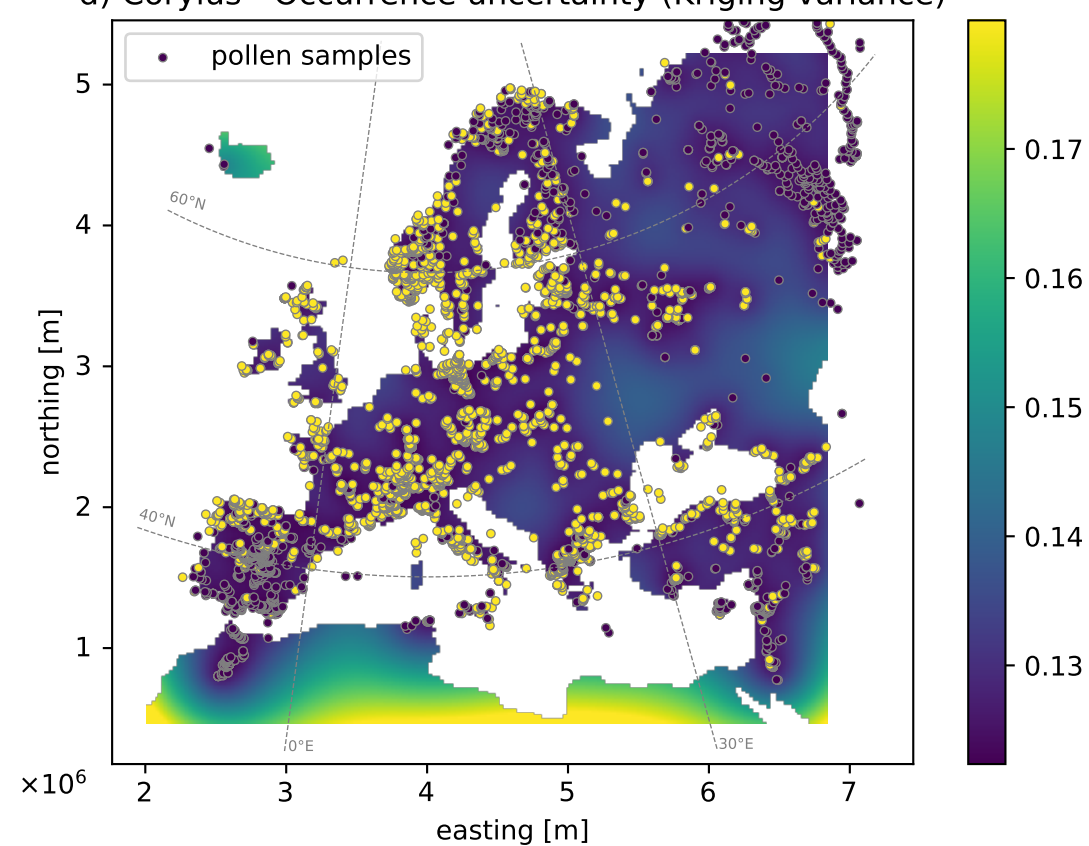

a) *Fagus* - Occurrence probability (Kriging mean)

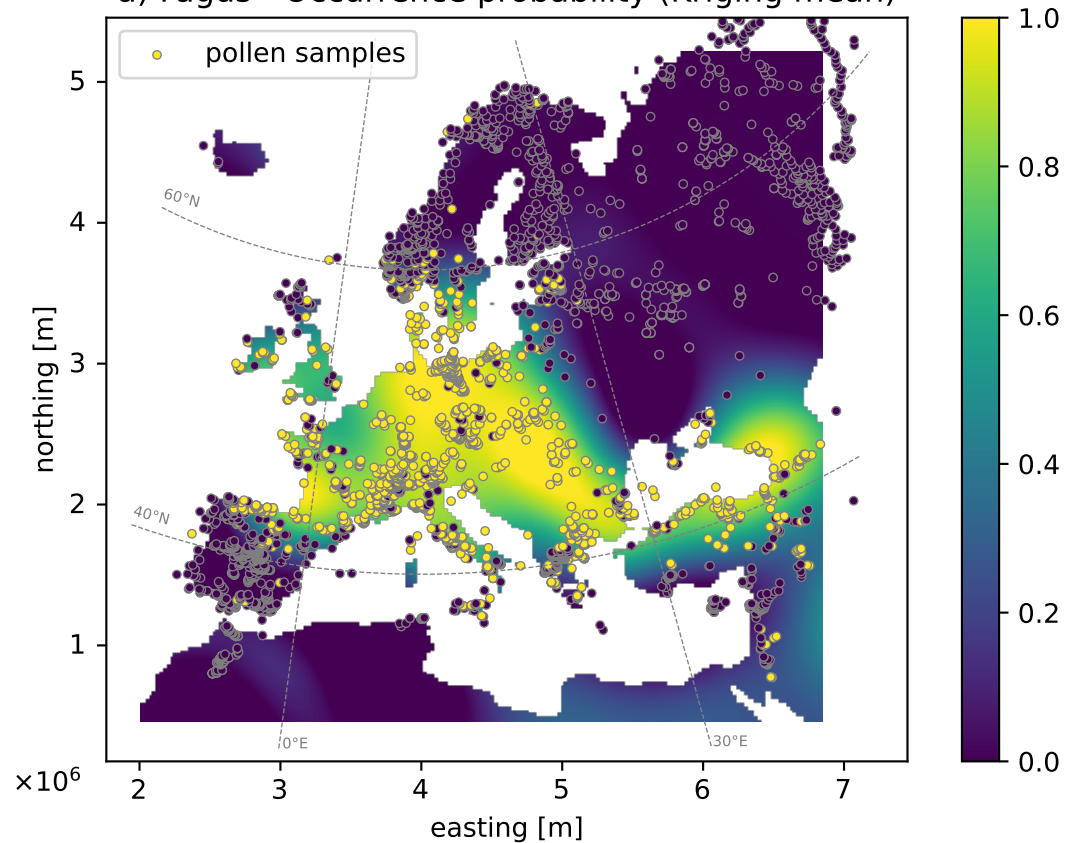

b) *Fagus* - Variogram

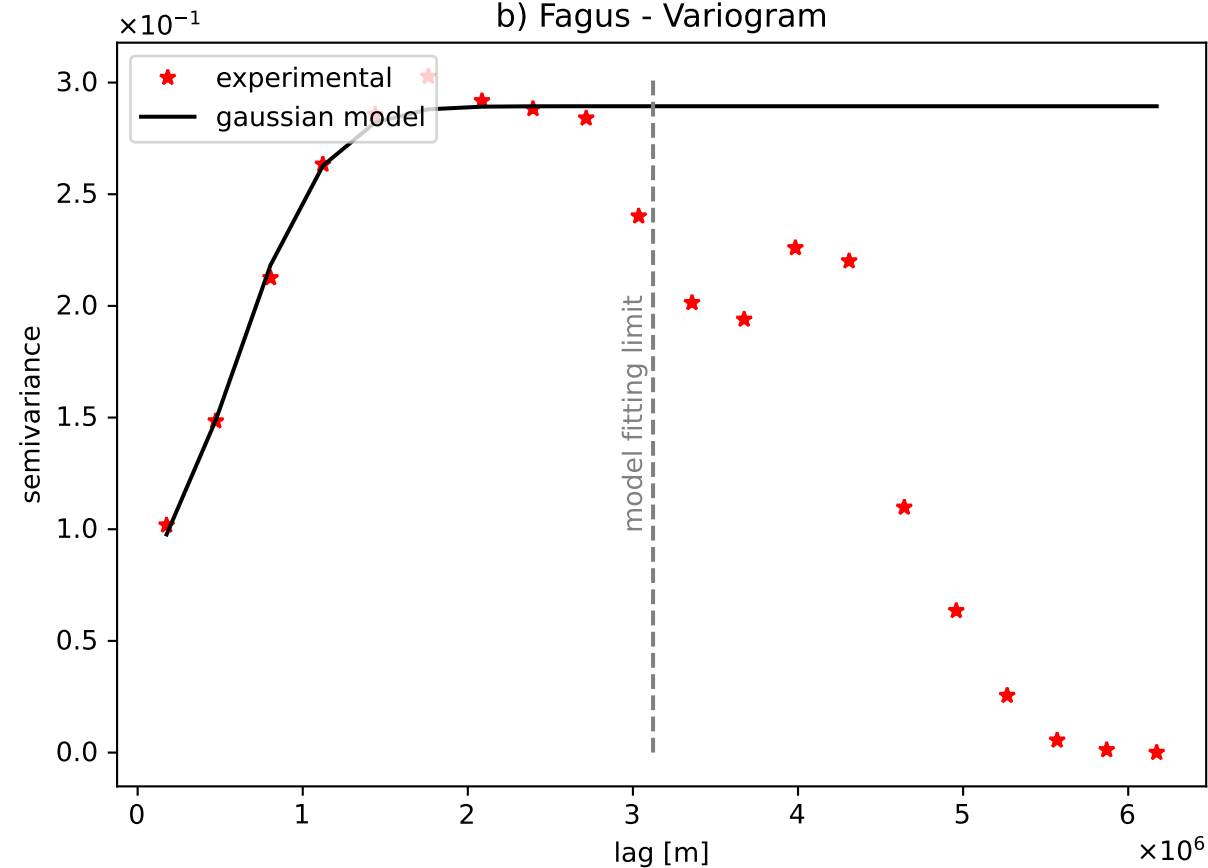

c) *Fagus* - Occurrence map (probability thresholds)

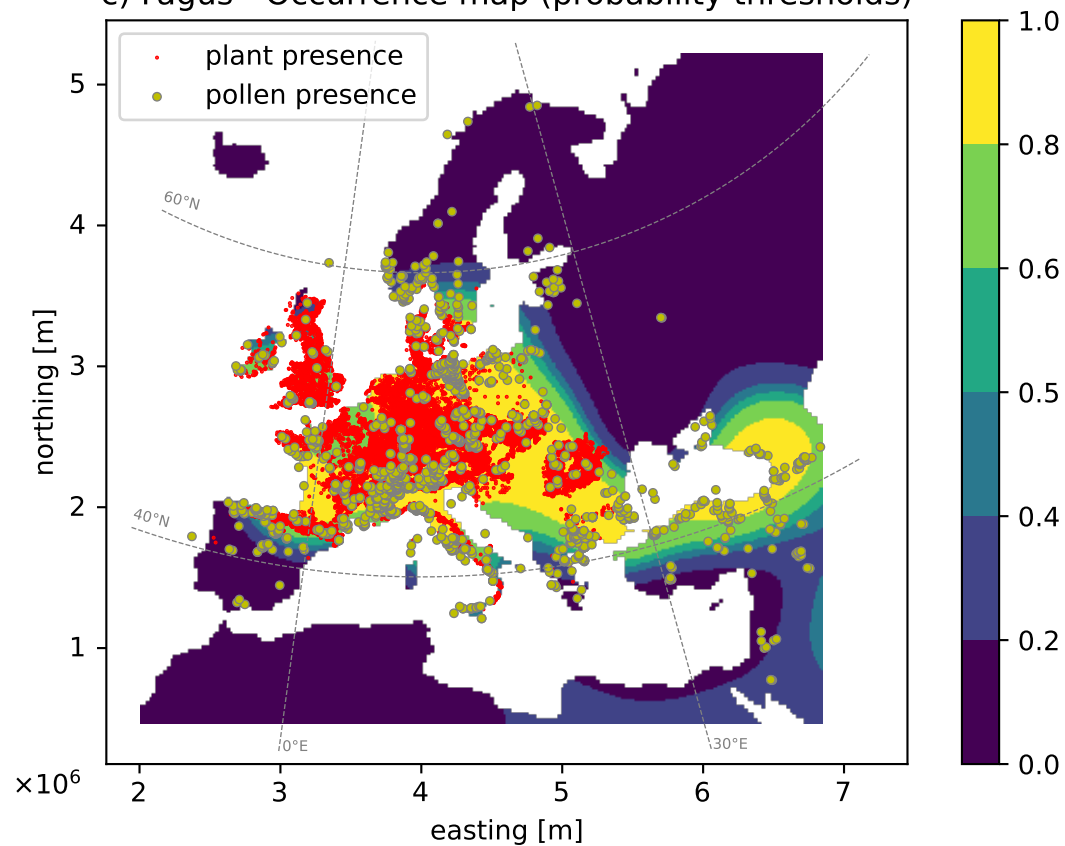

d) *Fagus* - Occurrence uncertainty (Kriging variance)

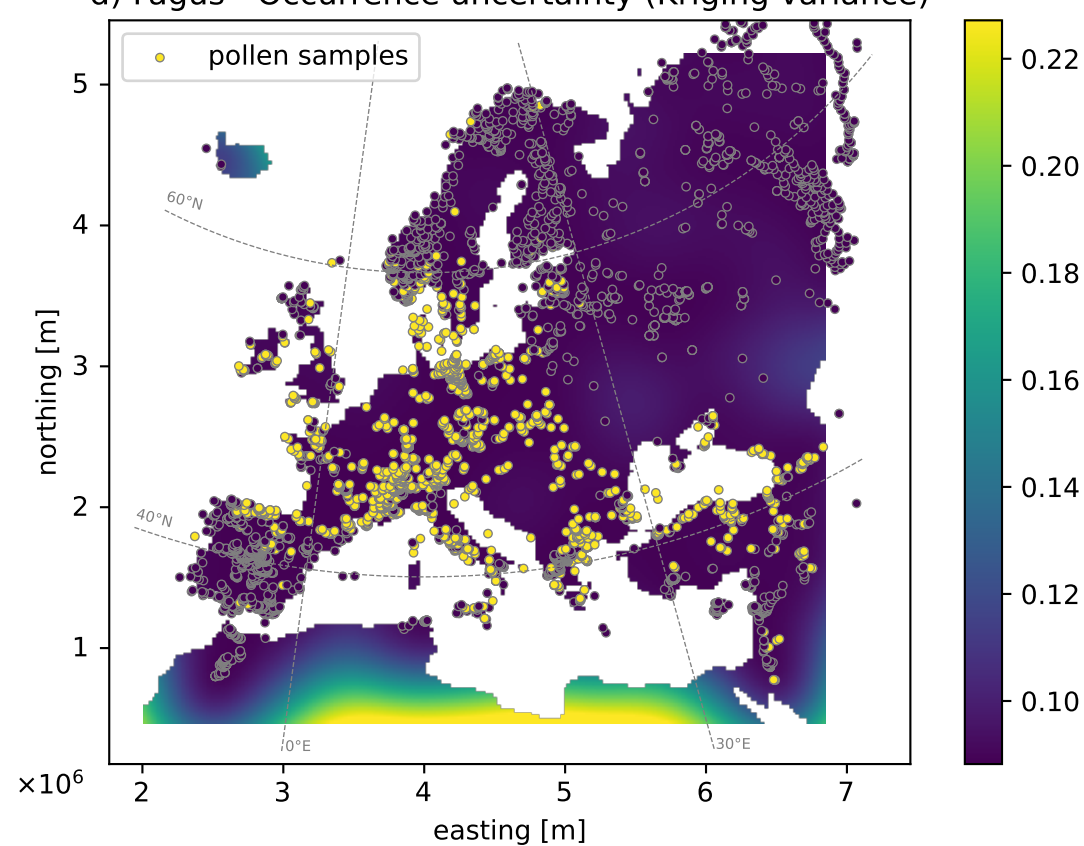

a) Juglans - Occurrence probability (Kriging mean)

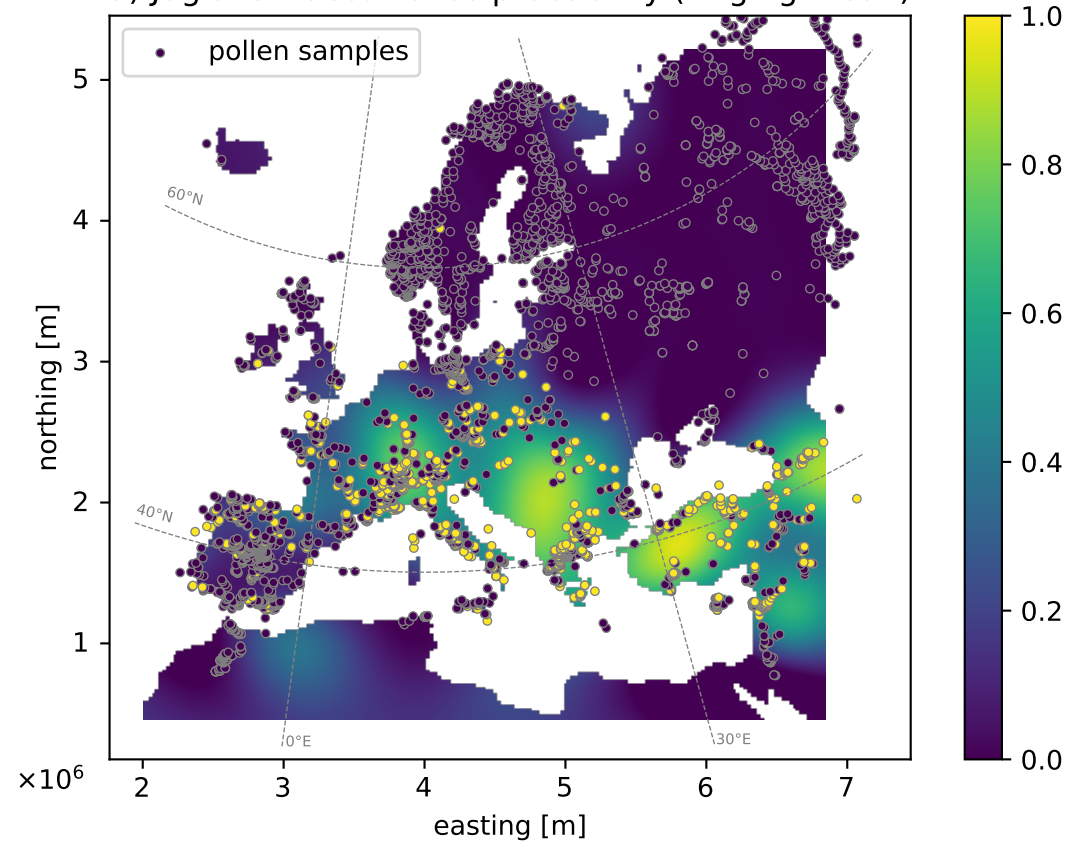

b) Juglans - Variogram

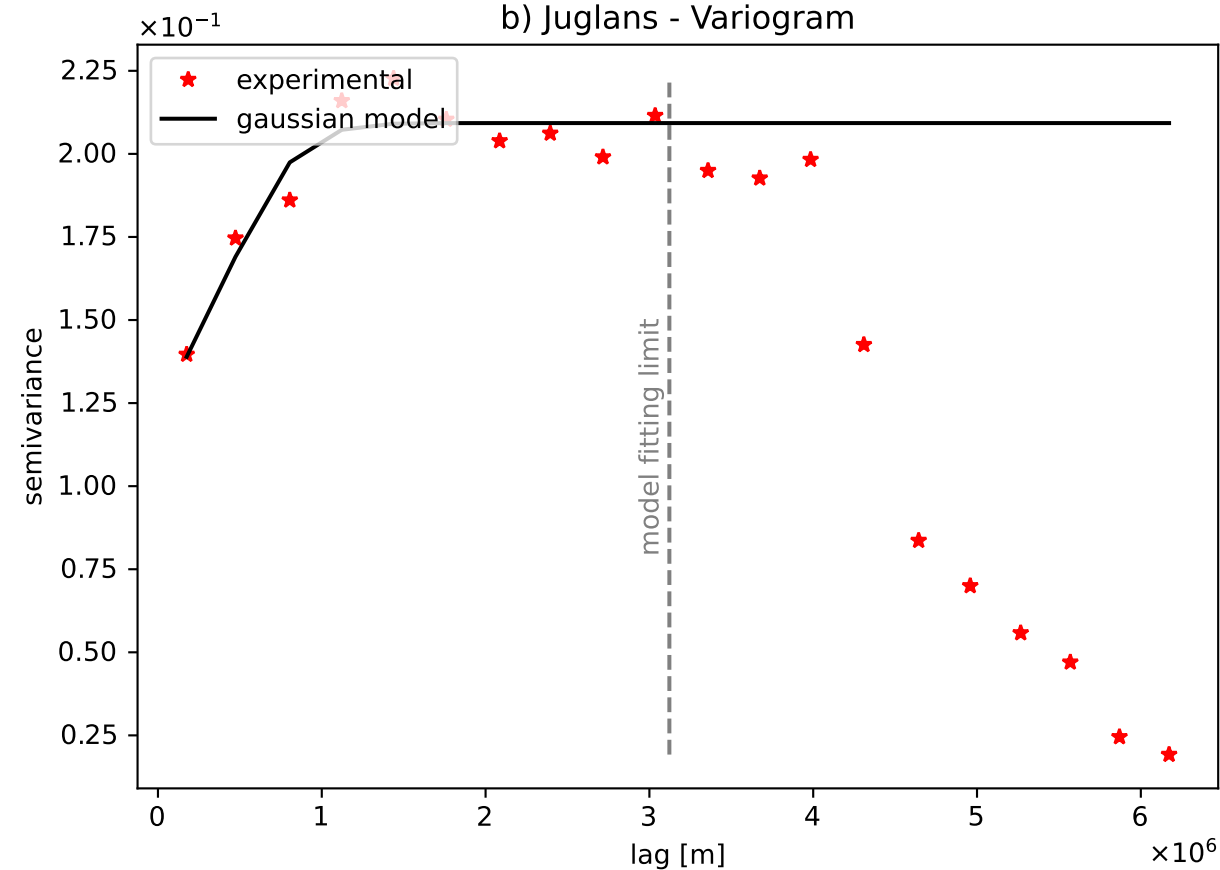

c) Juglans - Occurrence map (probability thresholds)

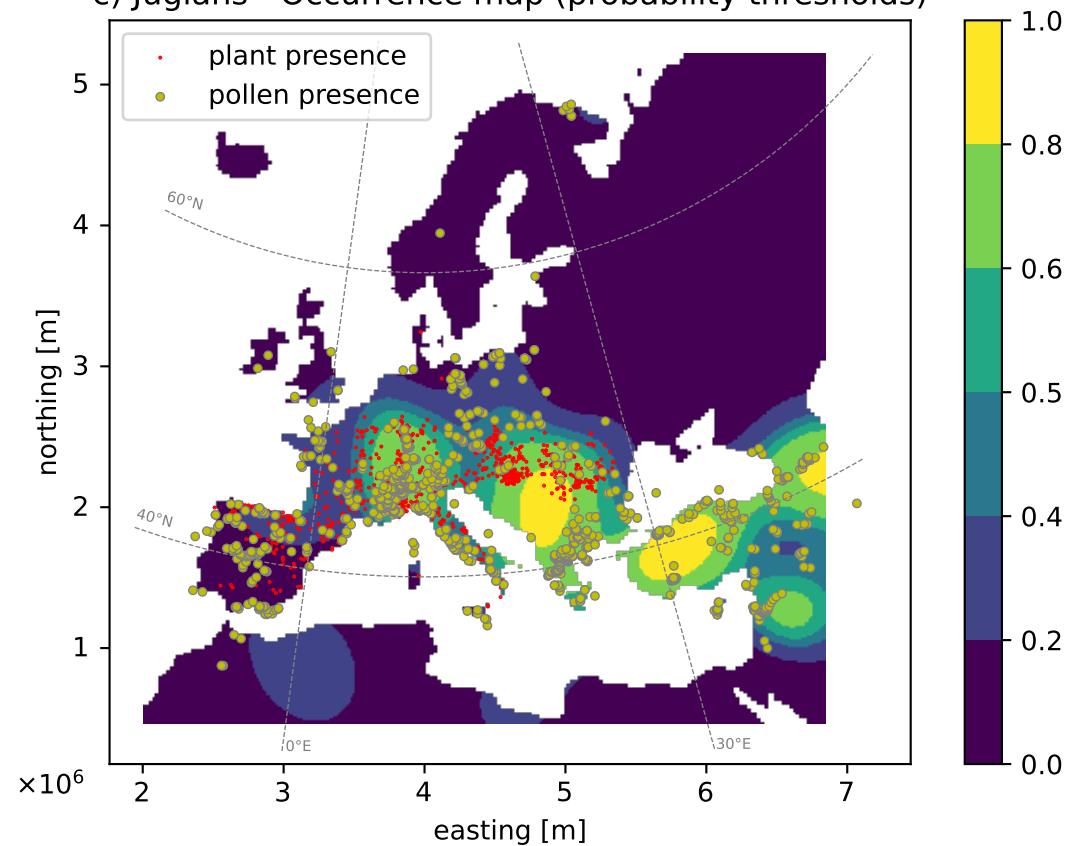

d) Juglans - Occurrence uncertainty (Kriging variance)

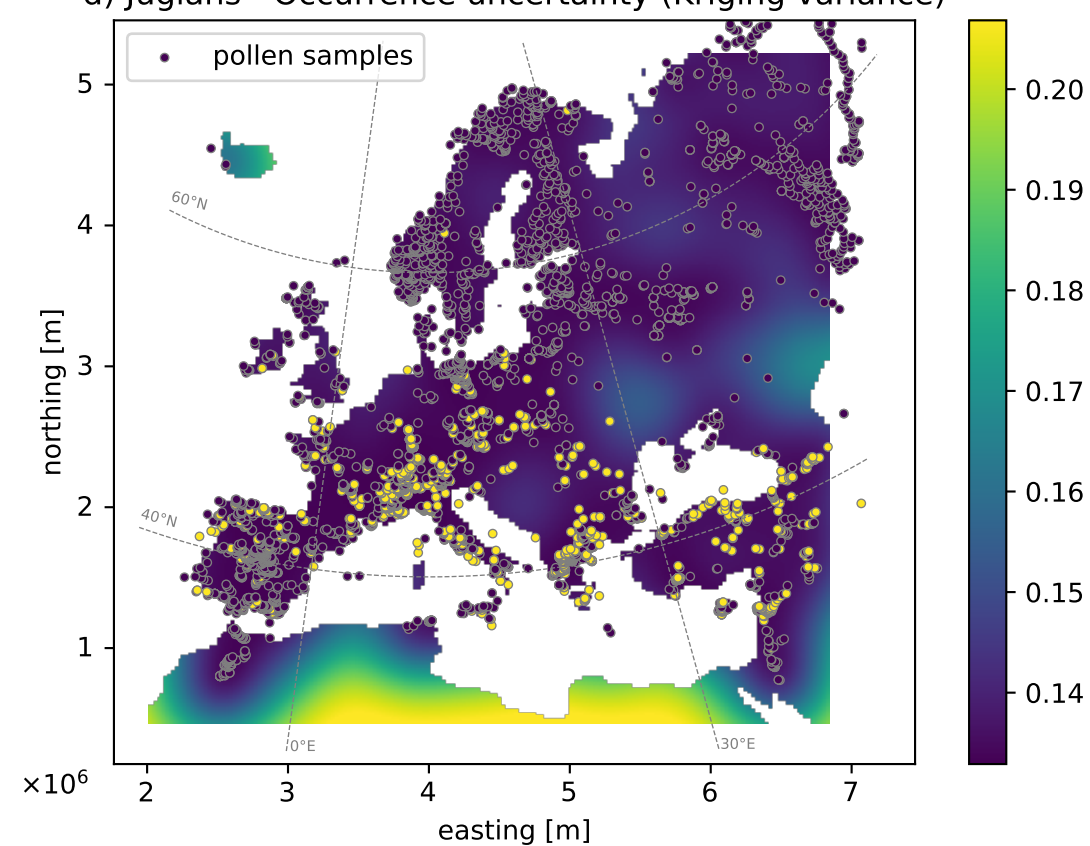



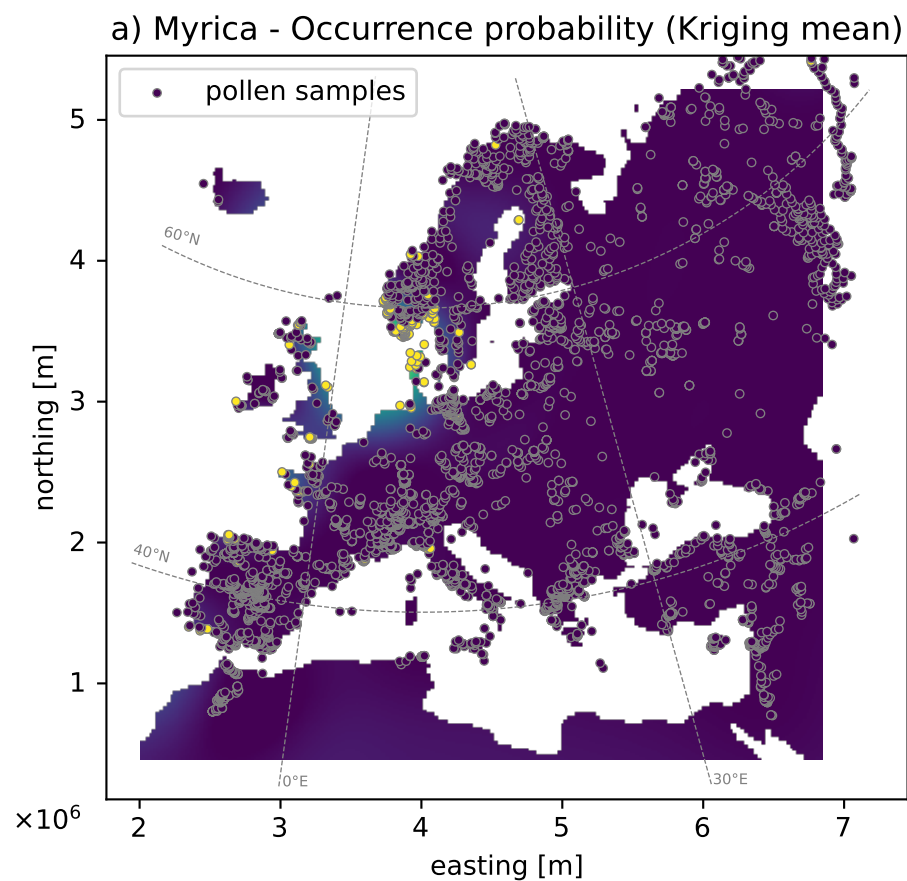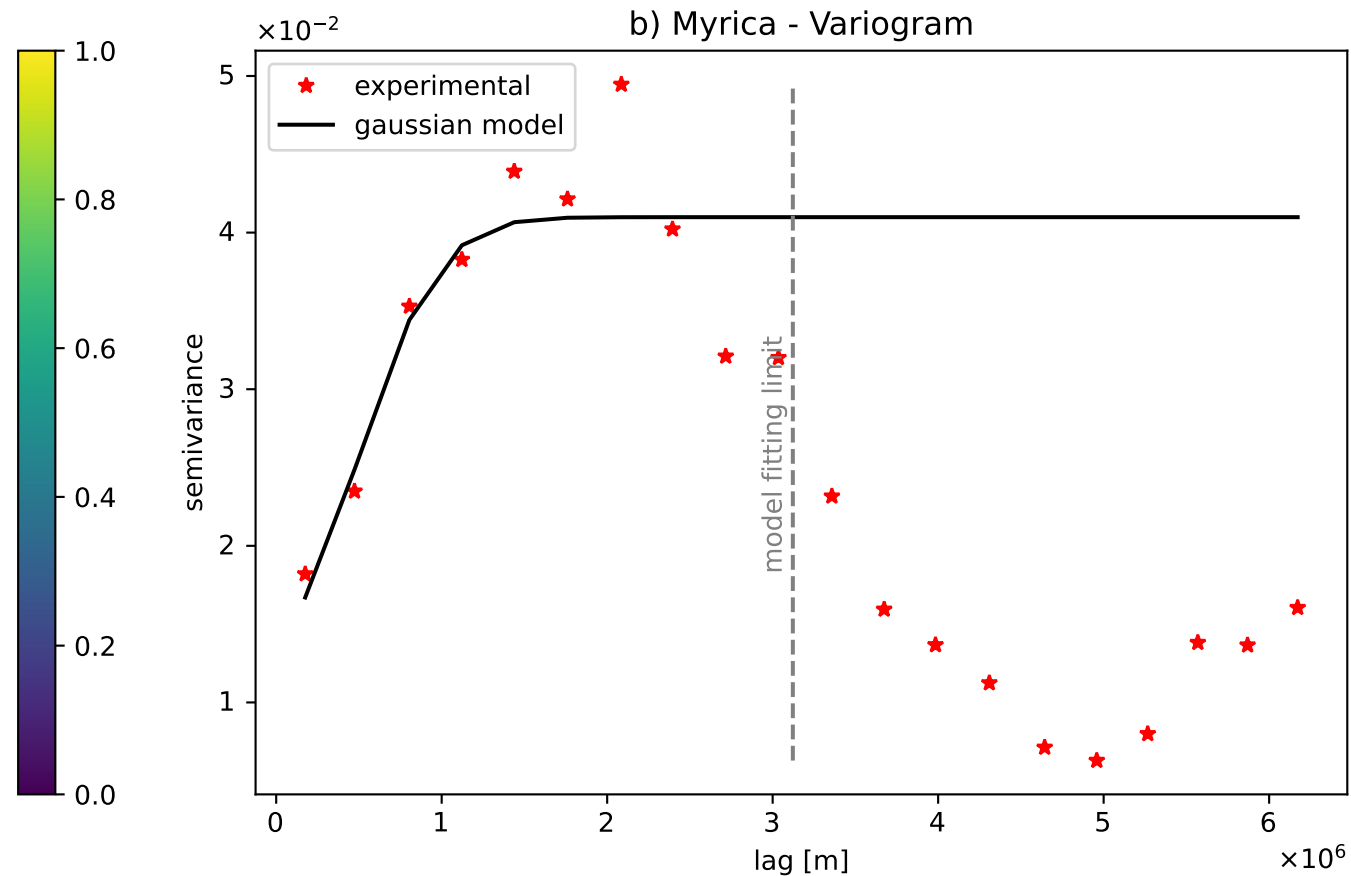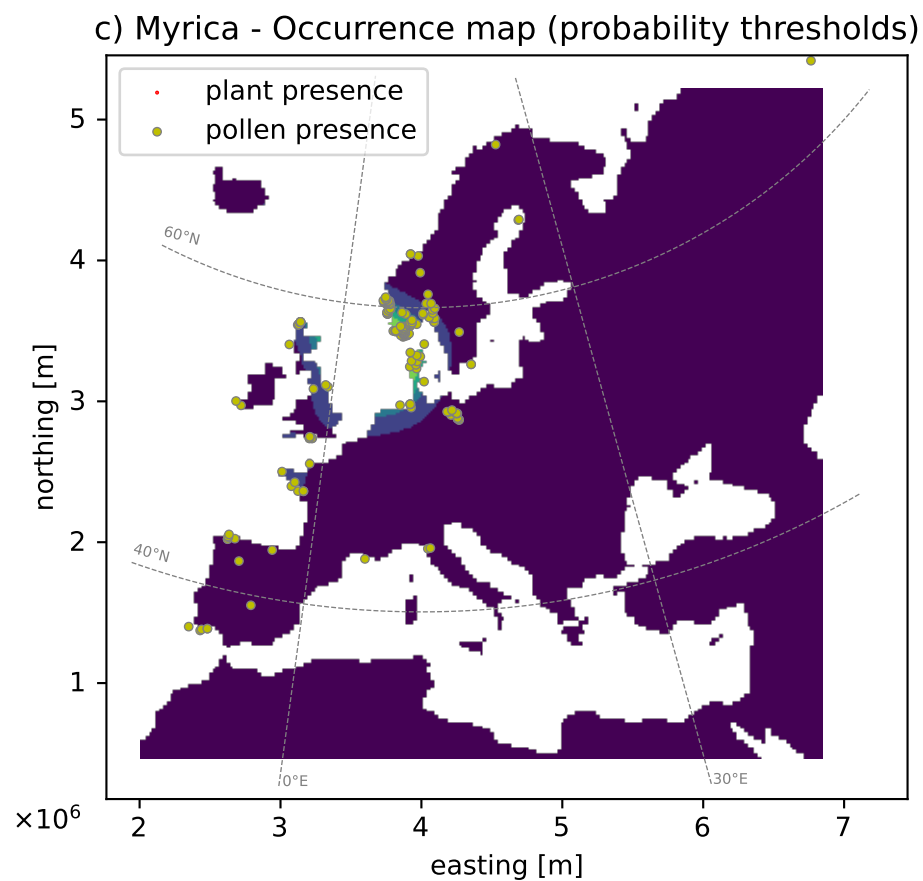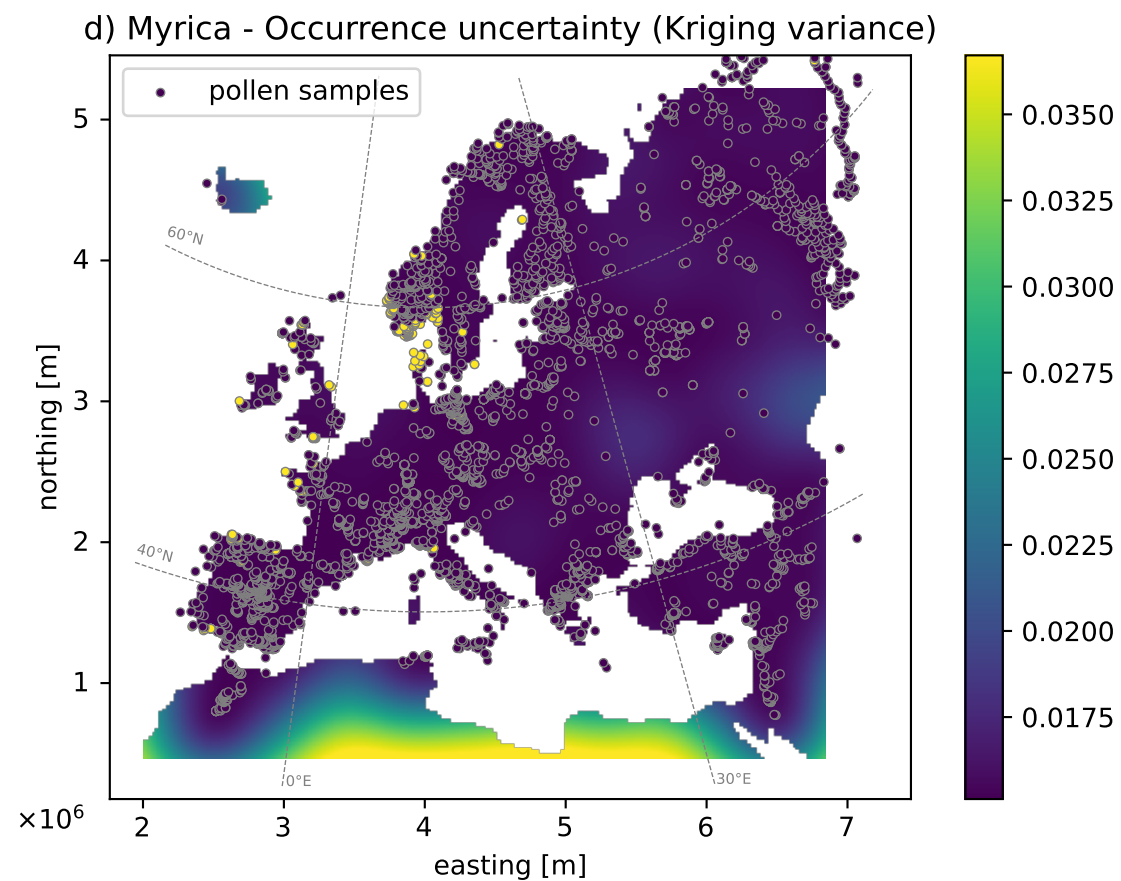



a) Olea - Occurrence probability (Kriging mean)

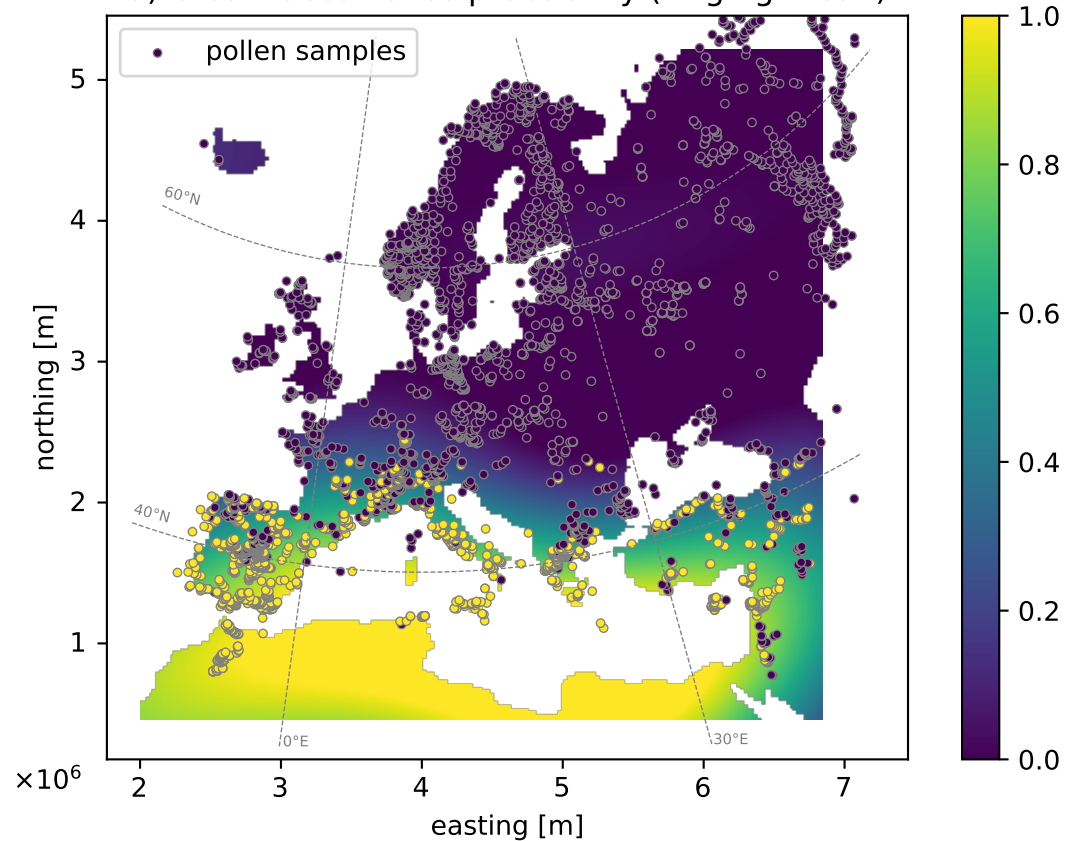

b) Olea - Variogram

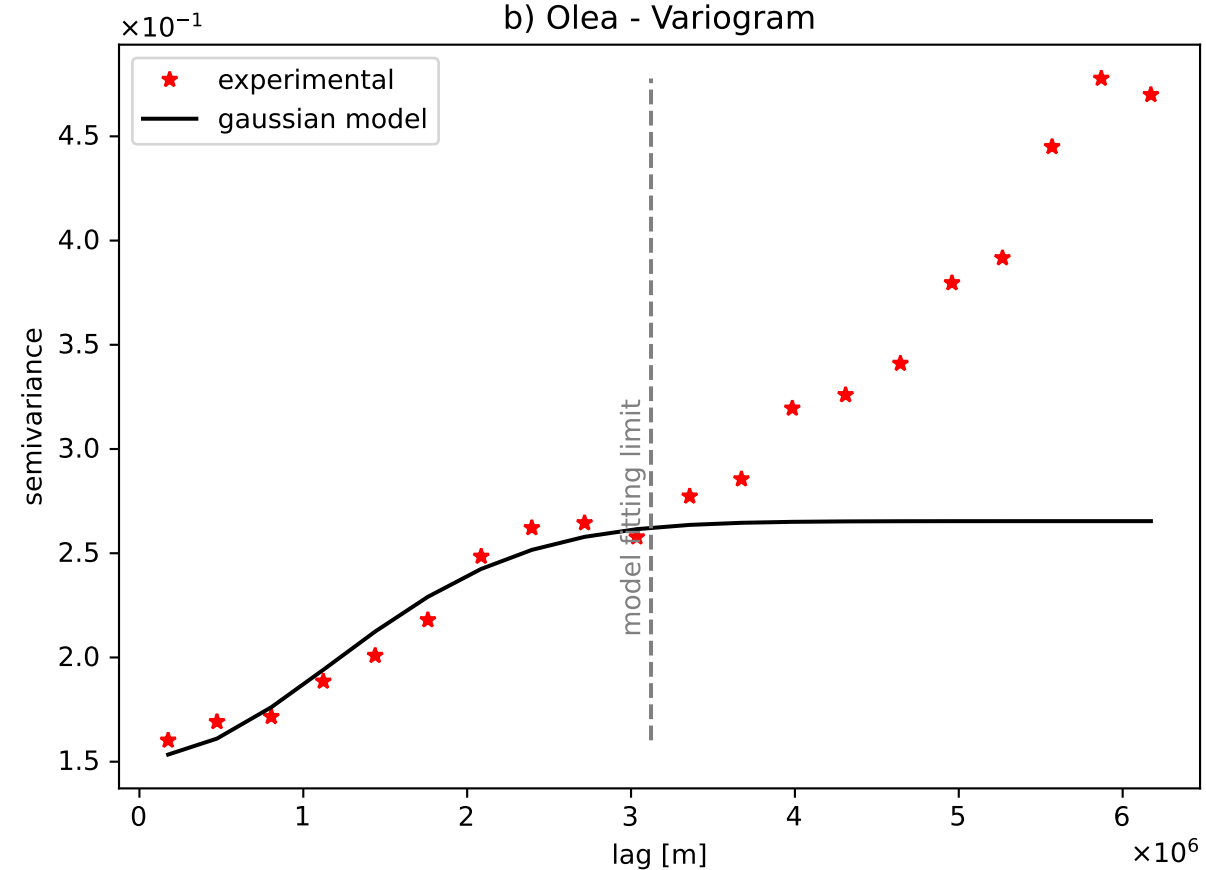

c) Olea - Occurrence map (probability thresholds)

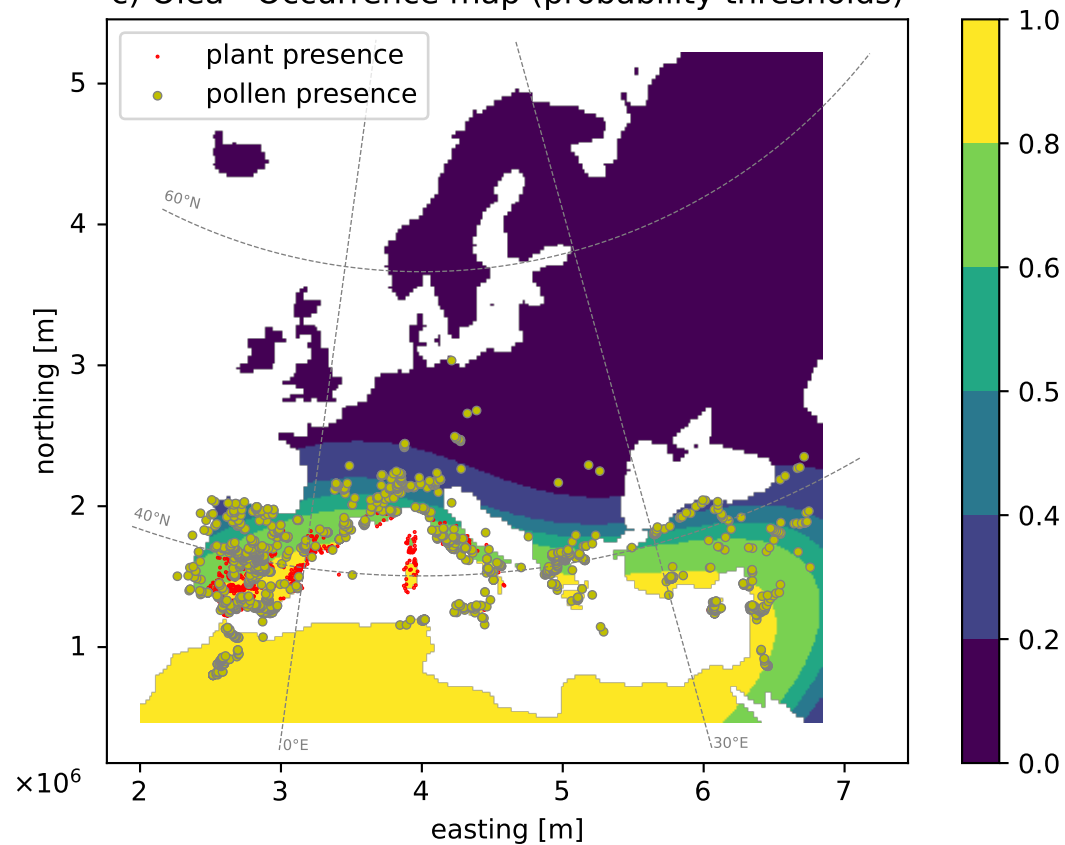

d) Olea - Occurrence uncertainty (Kriging variance)

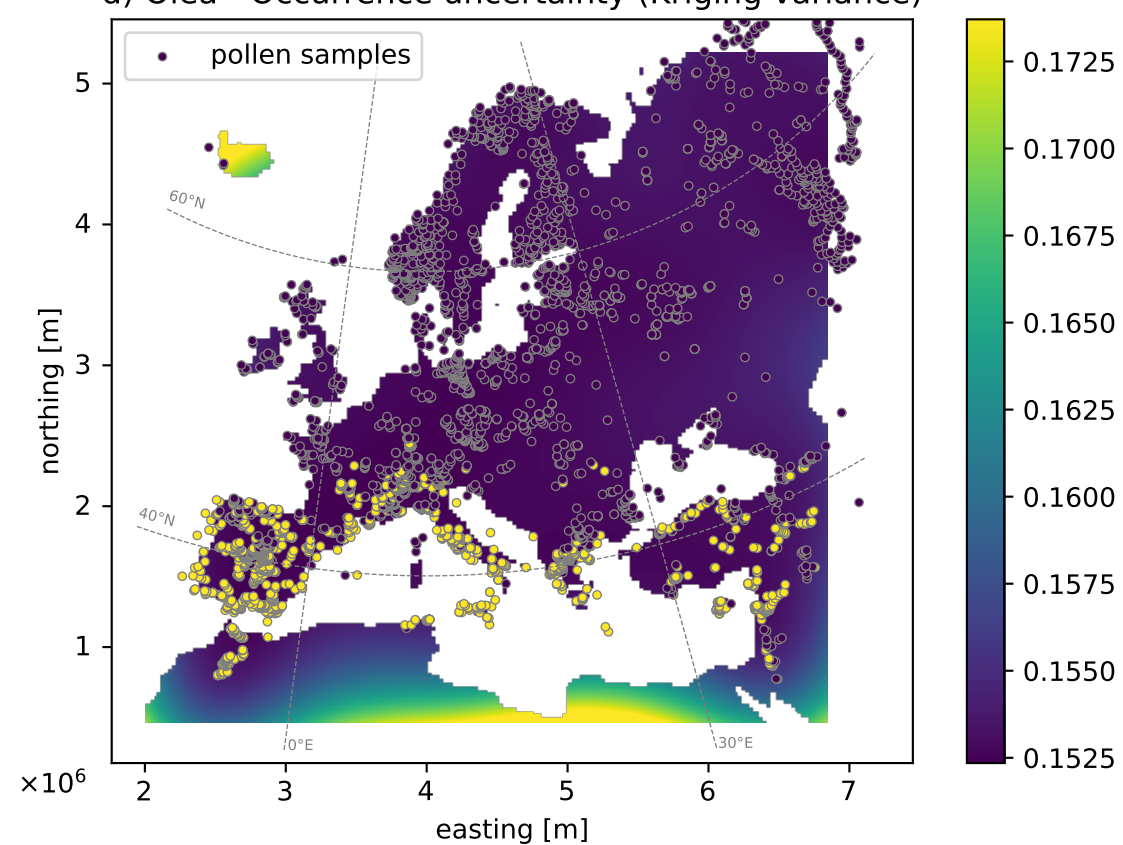

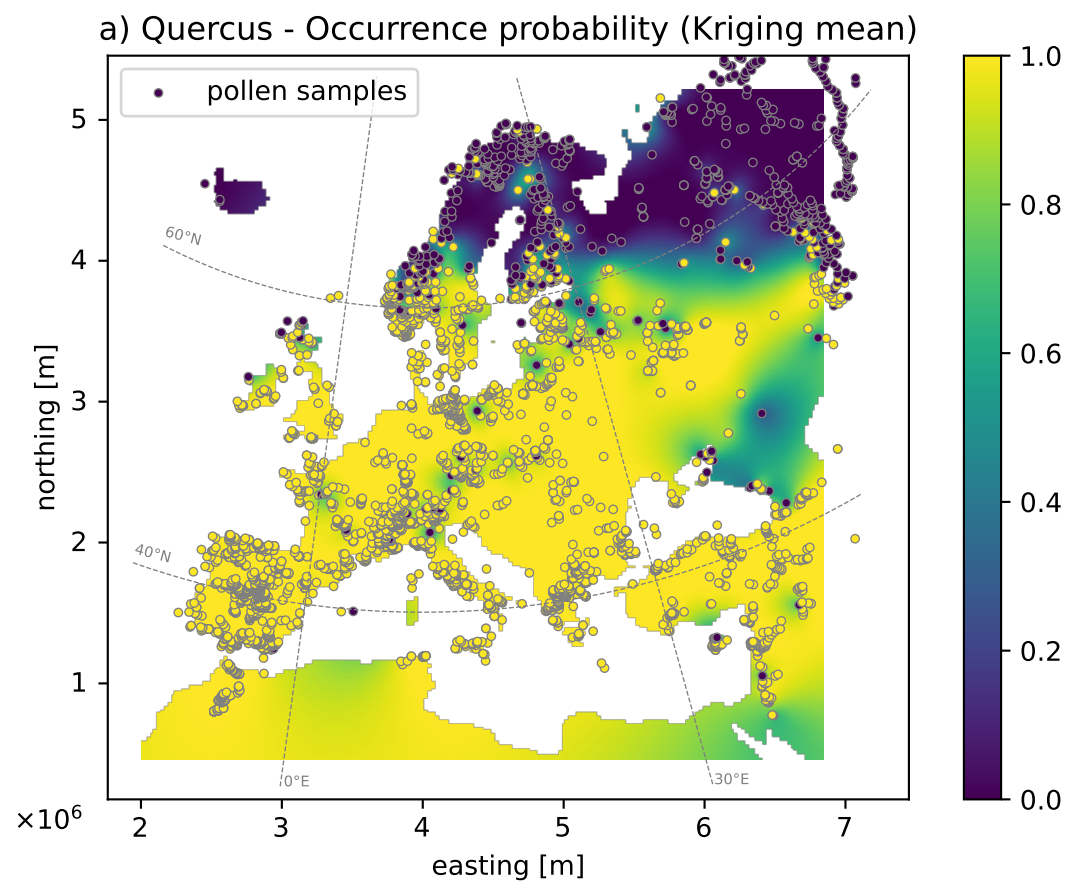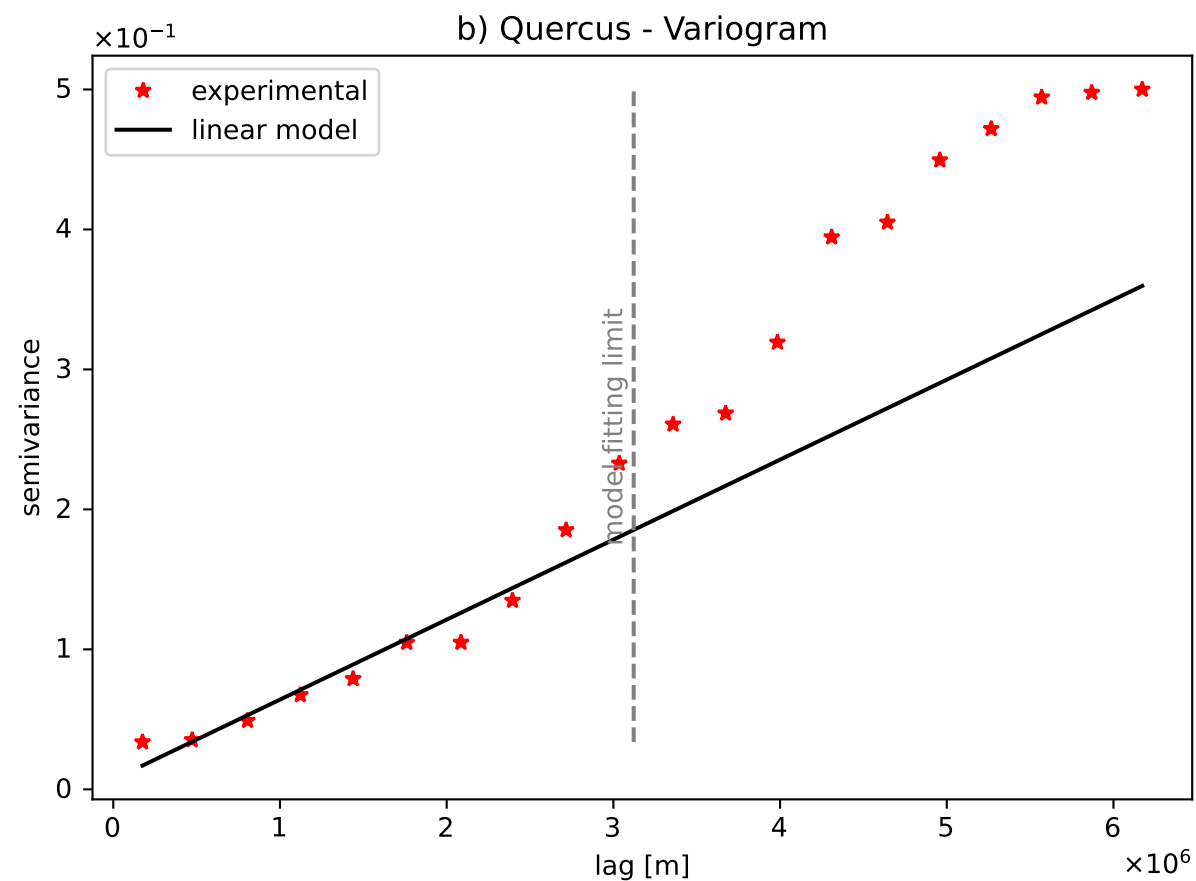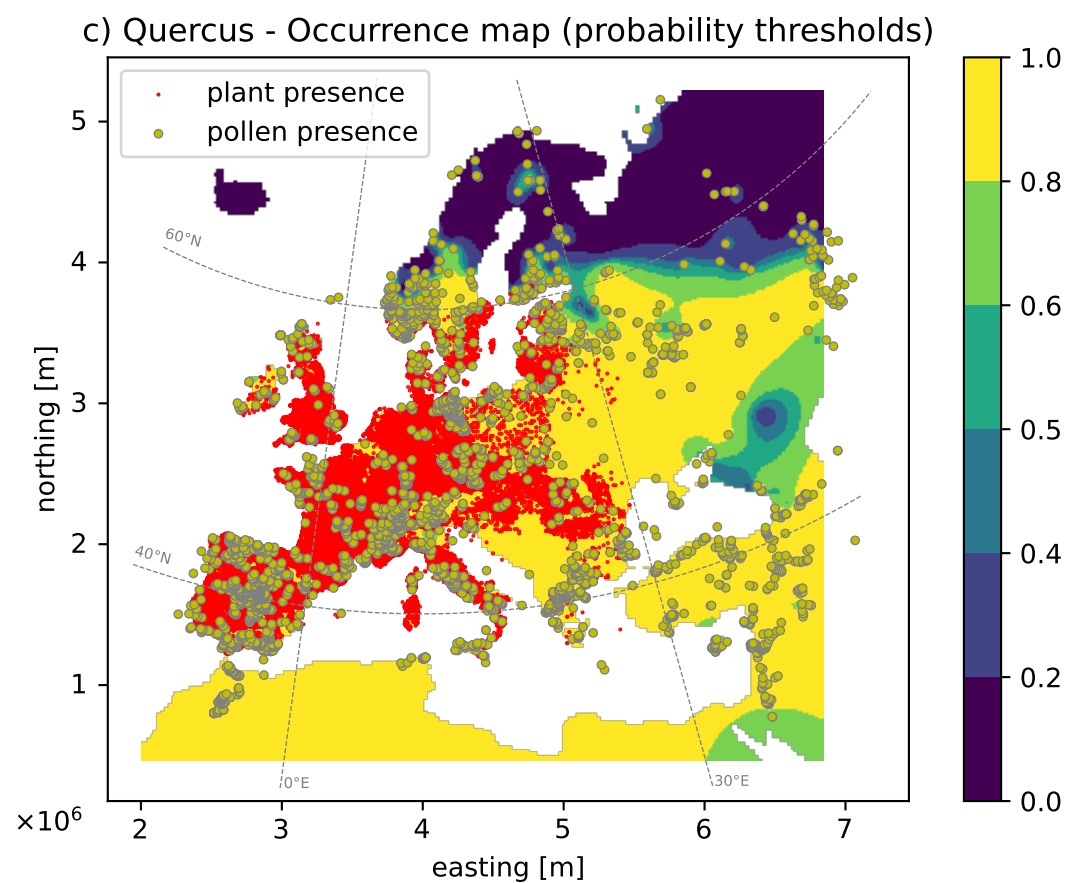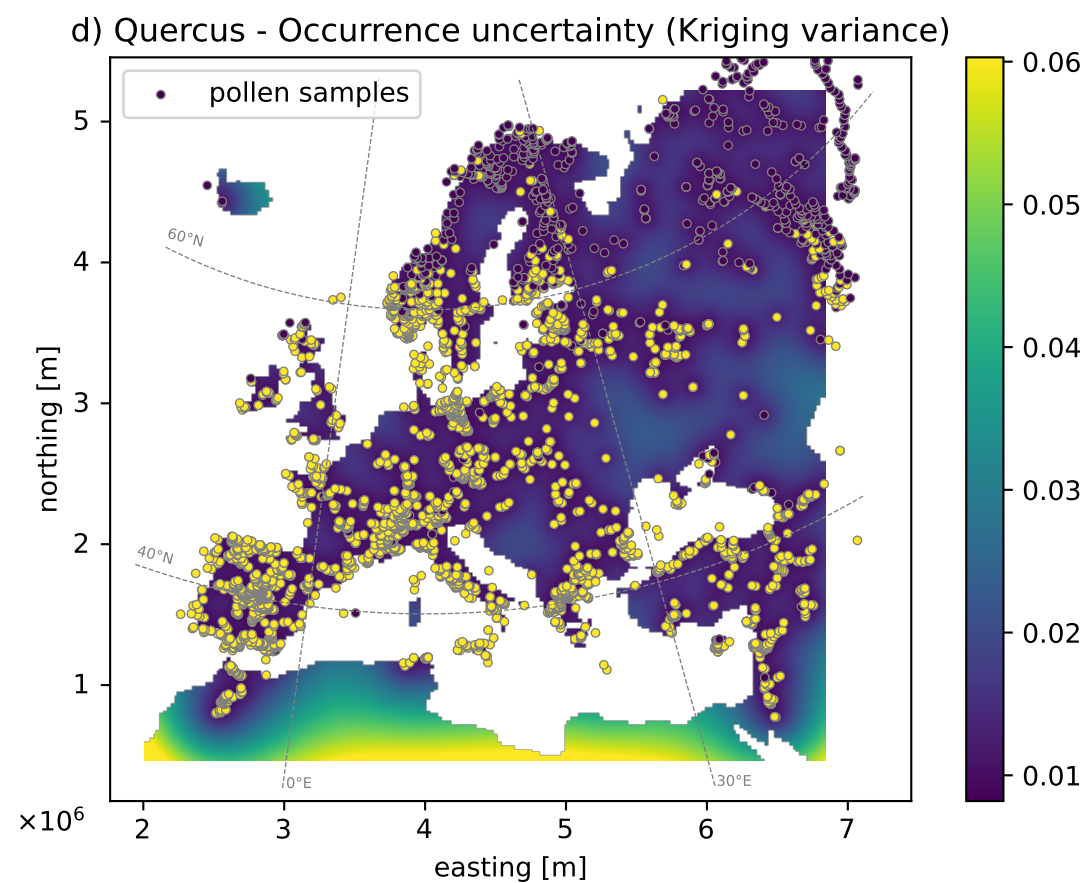

Supplement: Supplementary file 3 [file essd-2022-364-supplement.zip]
