# Supplementary material for: EUPollMap: The European atlas of contemporary pollen distribution maps derived from an integrated Kriging interpolation approach
Source: Copernicus journal article supplement (doi:10.5194/essd-2022-364), 2023-02-08
Supplement: Supplementary file 1 [file essd-2022-364-supplement.zip]

| 1) TAXA LIST |                    |          | Observed occurrence frequency [0-1] for different predicted probability classes |             |             |             |             |             |             |             |             |             |
|--------------|--------------------|----------|---------------------------------------------------------------------------------|-------------|-------------|-------------|-------------|-------------|-------------|-------------|-------------|-------------|
| #            | Taxa               | Group ID | 0-0.09                                                                          | 0.10-0.19   | 0.20-0.29   | 0.30-0.39   | 0.40-0.49   | 0.50-0.59   | 0.60-0.69   | 0.70-0.79   | 0.80-0.89   | 0.90-1.00   |
| 1            | Abies              | TRSH     | 0.05                                                                            | 0.10        | 0.19        | <b>0.19</b> | 0.58        | 0.55        | 0.60        | 0.69        | 0.88        | 0.93        |
| 2            | Acacia             | TRSH     | 0.01                                                                            | -           | -           | -           | -           | -           | -           | -           | -           | -           |
| 3            | Acanthaceae        | TRSH     | 0.00                                                                            | -           | -           | -           | -           | -           | -           | -           | -           | -           |
| 4            | Acer               | TRSH     | 0.05                                                                            | 0.13        | 0.27        | 0.30        | 0.44        | 0.57        | 0.70        | 0.76        | -           | -           |
| 5            | Actinidiaceae      | TRSH     | 0.00                                                                            | -           | -           | -           | -           | -           | -           | -           | -           | -           |
| 6            | Adoxaceae          | TRSH     | 0.00                                                                            | -           | -           | -           | -           | -           | -           | -           | -           | -           |
| 7            | Aesculus           | UPHE     | 0.01                                                                            | 0.07        | <b>0.00</b> | <b>0.00</b> | <b>0.75</b> | 0.50        | -           | -           | -           | -           |
| 8            | Ailanthus          | HERB     | 0.00                                                                            | -           | -           | -           | -           | -           | -           | -           | -           | -           |
| 9            | Aizoaceae          | HERB     | 0.00                                                                            | 0.25        | <b>0.50</b> | -           | -           | -           | -           | -           | -           | -           |
| 10           | Alnus              | TRSH     | <b>0.78</b>                                                                     | -           | -           | -           | -           | <b>0.00</b> | 0.55        | 0.74        | 0.98        | 0.96        |
| 11           | Amaranthaceae      | HERB     | <b>0.65</b>                                                                     | <b>0.33</b> | 0.15        | 0.38        | 0.57        | 0.65        | 0.76        | 0.77        | 0.80        | 0.93        |
| 12           | Amaryllidaceae     | TRSH     | 0.01                                                                            | -           | -           | -           | -           | -           | -           | -           | -           | -           |
| 13           | Anacardiaceae      | HERB     | 0.00                                                                            | 0.00        | -           | -           | -           | -           | -           | -           | -           | -           |
| 14           | Apiaceae           | TRSH     | <b>0.56</b>                                                                     | 0.27        | 0.21        | 0.42        | 0.33        | 0.54        | 0.72        | 0.72        | 0.86        | -           |
| 15           | Araceae            | TRSH     | 0.00                                                                            | -           | -           | -           | -           | -           | -           | -           | -           | -           |
| 16           | Araliaceae         | TRSH     | 0.04                                                                            | 0.11        | 0.23        | <b>0.19</b> | 0.43        | 0.67        | <b>0.20</b> | <b>0.33</b> | 0.88        | -           |
| 17           | Arbutus            | TRSH     | 0.03                                                                            | -           | -           | -           | -           | -           | -           | -           | -           | -           |
| 18           | Arctostaphylos     | HERB     | 0.01                                                                            | -           | -           | -           | -           | -           | -           | -           | -           | -           |
| 19           | Arecaceae          | HERB     | 0.00                                                                            | -           | -           | -           | -           | -           | -           | -           | -           | -           |
| 20           | Aristolochiaceae   | HERB     | 0.00                                                                            | 0.00        | <b>0.00</b> | <b>0.00</b> | -           | -           | -           | -           | -           | -           |
| 21           | Artemisia          | HERB     | <b>0.57</b>                                                                     | -           | 0.20        | 0.28        | 0.38        | 0.69        | 0.57        | 0.75        | 0.83        | 0.92        |
| 22           | Asparagaceae       | HERB     | 0.01                                                                            | -           | -           | -           | -           | -           | -           | -           | -           | -           |
| 23           | Asphodelaceae      | TRSH     | 0.05                                                                            | -           | -           | -           | -           | -           | -           | -           | -           | -           |
| 24           | Asteraceae undiff. | TRSH     | <b>0.93</b>                                                                     | 0.00        | <b>0.50</b> | 0.36        | 0.44        | 0.60        | 0.61        | 0.72        | 0.86        | 0.96        |
| 25           | Balsaminaceae      | HERB     | 0.00                                                                            | 0.03        | 0.29        | -           | -           | -           | -           | -           | -           | -           |
| 26           | Berberidaceae      | UPHE     | 0.01                                                                            | -           | -           | -           | -           | -           | -           | -           | -           | -           |
| 27           | Betula             | HERB     | <b>0.55</b>                                                                     | 0.16        | 0.18        | <b>0.19</b> | 0.32        | 0.61        | 0.78        | 0.86        | 0.85        | 0.99        |
| 28           | Betulaceae undiff. | HERB     | 0.00                                                                            | -           | -           | -           | -           | -           | -           | -           | -           | -           |
| 29           | Boraginaceae       | TRSH     | 0.11                                                                            | 0.13        | -           | -           | -           | -           | -           | -           | -           | -           |
| 30           | Brassicaceae       | TRSH     | <b>0.29</b>                                                                     | 0.15        | 0.27        | 0.31        | 0.38        | 0.52        | 0.65        | 0.75        | 0.88        | -           |
| 31           | Buddleja           | TRSH     | 0.00                                                                            | -           | -           | -           | -           | -           | -           | -           | -           | -           |
| 32           | Buxus              | HERB     | 0.02                                                                            | 0.22        | 0.15        | 0.34        | <b>0.29</b> | 0.61        | <b>0.30</b> | <b>0.00</b> | <b>0.00</b> | 1.00        |
| 33           | Camellia           | LIAN     | 0.00                                                                            | -           | -           | -           | -           | -           | -           | -           | -           | -           |
| 34           | Campanulaceae      | TRSH     | 0.03                                                                            | 0.12        | -           | -           | -           | -           | -           | -           | -           | -           |
| 35           | Cannabaceae        | HERB     | 0.04                                                                            | 0.11        | 0.16        | 0.37        | 0.47        | 0.49        | 0.60        | <b>1.00</b> | -           | -           |
| 36           | Capparaceae        | HERB     | 0.00                                                                            | -           | -           | -           | -           | -           | -           | -           | -           | -           |
| 37           | Capparis           | TRSH     | 0.00                                                                            | -           | -           | -           | -           | -           | -           | -           | -           | -           |
| 38           | Caprifoliaceae     | TRSH     | 0.12                                                                            | 0.12        | -           | -           | -           | -           | -           | -           | -           | -           |
| 39           | Carya              | HERB     | 0.00                                                                            | -           | -           | -           | -           | -           | -           | -           | -           | -           |
| 40           | Caryophyllaceae    | HERB     | <b>0.35</b>                                                                     | 0.11        | 0.30        | 0.37        | 0.42        | 0.58        | 0.68        | 0.83        | -           | -           |
| 41           | Castanea           | TRSH     | 0.03                                                                            | 0.06        | 0.21        | 0.32        | 0.43        | 0.59        | 0.70        | 0.81        | 0.85        | 0.96        |
| 42           | Casuarina          | HERB     | 0.01                                                                            | -           | -           | -           | -           | -           | -           | -           | -           | -           |
| 43           | Cedrus             | HERB     | 0.02                                                                            | 0.12        | 0.21        | 0.33        | 0.45        | 0.45        | 0.80        | 0.88        | 1.00        | 0.93        |
| 44           | Celastraceae       | HERB     | 0.02                                                                            | -           | -           | -           | -           | -           | -           | -           | -           | -           |
| 45           | Celtis             | HERB     | 0.01                                                                            | -           | -           | -           | -           | -           | -           | -           | -           | -           |
| 46           | Cephalanthus       | HERB     | 0.00                                                                            | -           | -           | -           | -           | -           | -           | -           | -           | -           |
| 47           | Ceratonia          | TRSH     | 0.01                                                                            | -           | -           | -           | -           | -           | -           | -           | -           | -           |
| 48           | Cercis             | TRSH     | 0.00                                                                            | 0.00        | <b>0.00</b> | -           | -           | -           | -           | -           | <b>0.00</b> | -           |
| 49           | Chamaerops         | TRSH     | 0.00                                                                            | 0.25        | -           | -           | -           | -           | -           | -           | -           | -           |
| 50           | Cistaceae          | TRSH     | 0.06                                                                            | 0.02        | 0.20        | 0.41        | <b>0.67</b> | <b>0.34</b> | -           | -           | -           | -           |
| 51           | Citrus             | TRSH     | 0.00                                                                            | -           | -           | -           | -           | -           | -           | -           | -           | -           |
| 52           | Clethra            | HERB     | 0.00                                                                            | -           | -           | -           | -           | -           | -           | -           | -           | -           |
| 53           | Colchicaceae       | TRSH     | 0.00                                                                            | 0.00        | -           | -           | -           | <b>0.00</b> | -           | -           | -           | <b>0.00</b> |
| 54           | Convolvulaceae     | HERB     | 0.04                                                                            | 0.16        | 0.29        | 0.31        | -           | -           | -           | -           | -           | -           |
| 55           | Coriariaceae       | HERB     | 0.00                                                                            | -           | -           | -           | -           | -           | -           | -           | -           | -           |
| 56           | Cornus             | HERB     | 0.02                                                                            | 0.11        | <b>0.09</b> | -           | -           | -           | -           | -           | -           | -           |
| 57           | Corylus            | TRSH     | <b>0.38</b>                                                                     | 0.20        | 0.25        | <b>0.16</b> | 0.33        | 0.56        | <b>0.84</b> | 0.86        | 0.91        | 0.95        |
| 58           | Cotinus            | HERB     | 0.00                                                                            | -           | -           | -           | -           | -           | -           | -           | -           | -           |
| 59           | Crassulaceae       | TRSH     | 0.07                                                                            | -           | -           | -           | -           | -           | -           | -           | -           | -           |
| 60           | Crataegus          | HERB     | 0.00                                                                            | 0.18        | <b>0.00</b> | -           | -           | -           | -           | -           | -           | -           |
| 61           | Cryptomeria        | HERB     | 0.00                                                                            | -           | -           | -           | -           | -           | -           | -           | -           | -           |
| 62           | Cucurbitaceae      | HERB     | 0.00                                                                            | -           | -           | -           | -           | -           | -           | -           | -           | -           |
| 63           | Cupressaceae       | HERB     | 0.01                                                                            | 0.09        | 0.13        | <b>0.86</b> | <b>0.29</b> | 0.45        | <b>1.00</b> | <b>1.00</b> | -           | -           |
| 64           | Cyperaceae         | HERB     | <b>0.66</b>                                                                     | -           | -           | <b>0.10</b> | <b>0.04</b> | 0.62        | 0.63        | 0.76        | 0.90        | 0.85        |
| 65           | Cytinaceae         | HERB     | 0.00                                                                            | -           | -           | -           | -           | -           | -           | -           | -           | -           |
| 66           | Datisceae          | DWAR     | 0.00                                                                            | 0.00        | <b>0.00</b> | -           | -           | <b>0.00</b> | -           | <b>0.00</b> | -           | -           |
| 67           | Dioscoreaceae      | DWAR     | 0.00                                                                            | -           | -           | -           | -           | -           | -           | -           | -           | -           |
| 68           | Dipsacaceae        | HERB     | 0.01                                                                            | 0.07        | 0.25        | <b>0.06</b> | 0.42        | <b>0.00</b> | -           | -           | -           | -           |
| 69           | Elaeagnaceae       | HERB     | 0.01                                                                            | 0.06        | 0.29        | 0.37        | 0.60        | -           | -           | -           | -           | -           |
| 70           | Elaeagnus          | HERB     | 0.00                                                                            | 0.00        | -           | -           | -           | -           | -           | -           | -           | -           |
| 71           | Ephedraceae        | HERB     | 0.05                                                                            | 0.14        | 0.17        | 0.43        | -           | -           | -           | -           | -           | -           |
| 72           | Ericales           | HERB     | <b>0.64</b>                                                                     | 0.12        | 0.26        | 0.27        | 0.43        | 0.62        | 0.61        | 0.80        | 0.93        | 0.97        |
| 73           | Eucalyptus         | TRSH     | 0.05                                                                            | -           | -           | -           | -           | -           | -           | -           | -           | -           |
| 74           | Euonymus           | LIAN     | 0.00                                                                            | 0.00        | <b>0.00</b> | -           | <b>0.00</b> | -           | -           | -           | -           | -           |
| 75           | Euphorbiaceae      | HERB     | 0.04                                                                            | 0.13        | 0.22        | 0.37        | 0.49        | 0.52        | 0.71        | <b>0.50</b> | 1.00        | -           |
| 76           | Fabaceae           | HERB     | <b>0.24</b>                                                                     | 0.09        | 0.24        | 0.25        | 0.46        | 0.49        | 0.60        | 0.81        | -           | -           |
| 77           | Fagus              | HERB     | 0.10                                                                            | 0.06        | <b>0.10</b> | <b>0.19</b> | 0.31        | 0.44        | <b>0.85</b> | 0.82        | 0.85        | 0.92        |
| 78           | Ficus              | HERB     | 0.00                                                                            | -           | -           | -           | -           | -           | -           | -           | -           | -           |
| 79           | Flueggea           | TRSH     | 0.00                                                                            | -           | -           | -           | -           | -           | -           | -           | -           | -           |
| 80           | Fothergilla        | HERB     | 0.00                                                                            | -           | -           | -           | -           | -           | -           | -           | -           | -           |
| 81           | Frangula           | HERB     | 0.04                                                                            | -           | -           | -           | -           | -           | -           | -           | -           | -           |

|     |                  |      |             |             |             |             |             |             |             |             |             |             |   |
|-----|------------------|------|-------------|-------------|-------------|-------------|-------------|-------------|-------------|-------------|-------------|-------------|---|
| 82  | Frankeniaceae    | HERB | 0.00        | -           | -           | -           | -           | -           | -           | -           | -           | -           | - |
| 83  | Fraxinus         | TRSH | 0.19        | 0.13        | 0.14        | 0.40        | 0.52        | 0.63        | 0.66        | 0.68        | 0.77        | -           | - |
| 84  | Genista          | UPHE | 0.04        | 0.11        | -           | -           | -           | -           | -           | -           | -           | -           | - |
| 85  | Gentianaceae     | TRSH | 0.04        | -           | -           | -           | -           | -           | -           | -           | -           | -           | - |
| 86  | Geraniaceae      | HERB | 0.06        | 0.18        | -           | -           | -           | -           | -           | -           | -           | -           | - |
| 87  | Grossulariaceae  | HERB | 0.01        | 0.10        | <b>0.00</b> | <b>0.17</b> | -           | -           | -           | -           | -           | -           | - |
| 88  | Hamamelidaceae   | TRSH | 0.00        | -           | -           | -           | -           | -           | -           | -           | -           | -           | - |
| 89  | Heliotropium     | TRSH | 0.00        | 0.00        | 0.33        | <b>0.00</b> | -           | <b>0.00</b> | <b>0.00</b> | <b>0.00</b> | -           | -           | - |
| 90  | Hypericaceae     | TRSH | 0.03        | 0.11        | 0.24        | 0.21        | 0.47        | <b>0.95</b> | 0.67        | -           | -           | -           | - |
| 91  | Ilex             | HERB | 0.03        | -           | -           | -           | -           | -           | -           | -           | -           | -           | - |
| 92  | Iridaceae        | DWAR | 0.00        | 0.00        | -           | -           | -           | -           | -           | -           | -           | -           | - |
| 93  | Juglandaceae     | DWAR | 0.01        | 0.22        | -           | -           | -           | -           | -           | -           | -           | -           | - |
| 94  | Juglans          | DWAR | 0.05        | 0.12        | 0.29        | 0.44        | 0.48        | 0.64        | 0.69        | 0.78        | 0.74        | -           | - |
| 95  | Juncaceae        | TRSH | 0.03        | -           | -           | -           | -           | -           | -           | -           | -           | -           | - |
| 96  | Juniperus        | PALM | <b>0.21</b> | 0.08        | 0.20        | 0.33        | 0.48        | 0.55        | 0.67        | 0.83        | 0.86        | 0.95        | - |
| 97  | Keteleeria       | TRSH | 0.00        | -           | -           | -           | -           | -           | -           | -           | -           | -           | - |
| 98  | Laburnum         | HERB | 0.00        | -           | -           | -           | -           | -           | -           | -           | -           | -           | - |
| 99  | Lamiaceae        | TRSH | 0.16        | 0.08        | 0.18        | 0.36        | 0.49        | <b>0.29</b> | <b>0.00</b> | -           | -           | -           | - |
| 100 | Larix            | HERB | 0.01        | 0.12        | 0.22        | 0.21        | 0.57        | <b>0.72</b> | 0.73        | 0.86        | <b>0.25</b> | -           | - |
| 101 | Laurus           | HERB | 0.00        | -           | -           | -           | -           | -           | -           | -           | -           | -           | - |
| 102 | Lentibulariaceae | HERB | 0.00        | 0.00        | 0.14        | 0.44        | 0.33        | -           | -           | -           | -           | -           | - |
| 103 | Ligustrum        | HERB | 0.02        | 0.17        | <b>0.09</b> | <b>0.17</b> | 0.50        | -           | -           | -           | -           | -           | - |
| 104 | Liliaceae        | HERB | 0.10        | 0.12        | -           | -           | -           | -           | -           | -           | -           | -           | - |
| 105 | Linaceae         | HERB | 0.02        | 0.00        | -           | -           | -           | -           | -           | -           | -           | -           | - |
| 106 | Liquidambar      | TRSH | 0.00        | -           | -           | -           | -           | -           | -           | -           | -           | -           | - |
| 107 | Loranthaceae     | HERB | 0.00        | -           | -           | -           | -           | -           | -           | -           | -           | -           | - |
| 108 | Lythraceae       | HERB | 0.01        | 0.07        | 0.33        | <b>0.00</b> | -           | -           | -           | -           | -           | -           | - |
| 109 | Magnolia         | HERB | 0.00        | 0.00        | <b>0.00</b> | -           | -           | -           | -           | -           | -           | -           | - |
| 110 | Malvaceae        | HERB | 0.02        | -           | -           | -           | -           | -           | -           | -           | -           | -           | - |
| 111 | Melanthiaceae    | HERB | 0.00        | 0.00        | -           | -           | <b>1.00</b> | -           | -           | -           | -           | -           | - |
| 112 | Montiaceae       | HERB | 0.00        | -           | -           | -           | <b>0.00</b> | -           | -           | -           | -           | -           | - |
| 113 | Moraceae         | HERB | 0.00        | 0.00        | -           | -           | -           | -           | -           | -           | -           | -           | - |
| 114 | Morus            | HERB | 0.01        | -           | -           | -           | -           | -           | -           | -           | -           | -           | - |
| 115 | Myrica           | HERB | 0.02        | 0.13        | 0.17        | 0.41        | <b>0.27</b> | 0.64        | <b>0.83</b> | <b>0.50</b> | -           | -           | - |
| 116 | Myrtaceae        | HERB | 0.01        | -           | -           | -           | -           | -           | -           | -           | -           | -           | - |
| 117 | Myrtus           | HERB | 0.01        | 0.00        | <b>0.00</b> | -           | -           | <b>0.00</b> | <b>0.00</b> | -           | -           | -           | - |
| 118 | Nartheciaceae    | HERB | 0.00        | 0.22        | <b>0.00</b> | -           | -           | -           | -           | -           | -           | -           | - |
| 119 | Nerium           | HERB | 0.00        | 0.00        | <b>0.00</b> | <b>0.00</b> | <b>0.00</b> | <b>0.00</b> | -           | -           | <b>0.00</b> | -           | - |
| 120 | Nitrariaceae     | HERB | 0.00        | <b>0.33</b> | <b>0.00</b> | <b>1.00</b> | 0.50        | <b>0.00</b> | <b>0.00</b> | -           | <b>0.00</b> | <b>0.50</b> | - |
| 121 | Olea             | HERB | 0.13        | 0.07        | <b>0.04</b> | 0.38        | 0.39        | 0.41        | 0.69        | 0.82        | 0.94        | 0.98        | - |
| 122 | Oleaceae undiff. | HERB | 0.02        | 0.14        | 0.37        | -           | -           | -           | -           | -           | -           | -           | - |
| 123 | Onagraceae       | HERB | 0.04        | 0.10        | <b>0.09</b> | -           | -           | -           | -           | -           | -           | -           | - |
| 124 | Orchidaceae      | TRSH | 0.00        | 0.00        | -           | -           | -           | -           | -           | -           | -           | -           | - |
| 125 | Orobanchaceae    | HERB | 0.06        | 0.10        | 0.25        | 0.36        | 0.38        | 0.46        | 0.80        | 0.68        | -           | -           | - |
| 126 | Ostrya, Carpinus | HERB | 0.08        | 0.25        | 0.12        | 0.32        | 0.53        | 0.58        | 0.57        | 0.79        | 0.82        | 0.94        | - |
| 127 | Oxalidaceae      | TRSH | 0.01        | 0.08        | <b>0.45</b> | -           | -           | -           | -           | -           | -           | -           | - |
| 128 | Paeoniaceae      | HERB | 0.00        | -           | -           | -           | -           | -           | -           | -           | -           | -           | - |
| 129 | Papaveraceae     | HERB | 0.06        | -           | -           | -           | -           | -           | -           | -           | -           | -           | - |
| 130 | Parrotia         | TRSH | 0.00        | -           | -           | -           | -           | -           | -           | -           | -           | -           | - |
| 131 | Paulownia        | TRSH | 0.00        | -           | -           | -           | -           | -           | -           | -           | -           | -           | - |
| 132 | Phillyrea        | TRSH | 0.04        | 0.05        | 0.35        | <b>0.86</b> | -           | -           | -           | -           | -           | -           | - |
| 133 | Phoenix          | HERB | 0.00        | 0.00        | -           | -           | -           | -           | -           | -           | -           | -           | - |
| 134 | Phyllanthaceae   | HERB | 0.00        | 0.14        | <b>0.00</b> | -           | -           | -           | -           | -           | -           | -           | - |
| 135 | Picea            | TRSH | 0.10        | 0.16        | 0.15        | <b>0.19</b> | <b>0.06</b> | 0.43        | <b>0.86</b> | 0.70        | 0.90        | 0.96        | - |
| 136 | Pinaceae         | TRSH | 0.00        | 0.00        | -           | -           | -           | -           | <b>0.00</b> | <b>1.00</b> | -           | -           | - |
| 137 | Pinus            | TRSH | <b>0.93</b> | 0.20        | <b>0.48</b> | 0.33        | 0.55        | <b>0.36</b> | <b>0.00</b> | 0.75        | 0.98        | 0.99        | - |
| 138 | Pistacia         | TRSH | 0.07        | 0.11        | 0.21        | 0.34        | 0.39        | 0.48        | <b>0.89</b> | <b>1.00</b> | -           | -           | - |
| 139 | Plantaginaceae   | TRSH | <b>0.52</b> | 0.06        | 0.22        | 0.41        | 0.35        | 0.66        | 0.70        | 0.72        | 0.89        | 0.93        | - |
| 140 | Platanus         | DWAR | 0.02        | 0.12        | 0.21        | 0.48        | 0.51        | 0.63        | 0.50        | 0.74        | 0.95        | -           | - |
| 141 | Plumbaginaceae   | TRSH | 0.04        | -           | -           | -           | -           | -           | -           | -           | -           | -           | - |
| 142 | Poaceae          | TRSH | <b>0.96</b> | -           | -           | -           | -           | -           | <b>1.00</b> | 0.89        | 0.85        | 0.98        | - |
| 143 | Polemoniaceae    | TRSH | 0.01        | -           | -           | -           | -           | -           | -           | -           | -           | -           | - |
| 144 | Polygalaceae     | TRSH | 0.00        | 0.00        | <b>0.00</b> | -           | -           | -           | -           | -           | -           | -           | - |
| 145 | Polygonaceae     | TRSH | <b>0.26</b> | 0.07        | 0.25        | 0.34        | 0.52        | -           | -           | -           | -           | -           | - |
| 146 | Populus          | HERB | 0.14        | 0.16        | -           | -           | -           | -           | -           | -           | -           | -           | - |
| 147 | Primulaceae      | UPHE | 0.04        | 0.12        | 0.13        | 0.29        | <b>0.25</b> | <b>0.23</b> | -           | -           | -           | -           | - |
| 148 | Prosopis         | HERB | 0.00        | 0.13        | <b>0.00</b> | -           | -           | -           | -           | -           | -           | -           | - |
| 149 | Prunus           | TRSH | 0.04        | 0.14        | <b>0.43</b> | -           | -           | -           | -           | -           | -           | -           | - |
| 150 | Pterocarya       | TRSH | 0.00        | 0.11        | <b>1.00</b> | -           | -           | -           | -           | -           | -           | -           | - |
| 151 | Punica           | TRSH | 0.00        | -           | -           | -           | -           | -           | -           | -           | -           | -           | - |
| 152 | Quercus          | HERB | <b>0.71</b> | 0.08        | 0.11        | <b>0.19</b> | 0.36        | 0.62        | 0.78        | <b>0.94</b> | 0.96        | 0.97        | - |
| 153 | Ranunculaceae    | LIAN | <b>0.34</b> | 0.18        | 0.21        | 0.33        | 0.46        | 0.58        | 0.63        | 0.77        | 0.81        | 0.97        | - |
| 154 | Resedaceae       | HERB | 0.01        | -           | -           | -           | -           | -           | -           | -           | -           | -           | - |
| 155 | Rhamnaceae       | HERB | 0.01        | -           | -           | -           | -           | -           | -           | -           | -           | -           | - |
| 156 | Rhamnus          | TRSH | 0.04        | 0.13        | 0.28        | -           | -           | -           | -           | -           | -           | -           | - |
| 157 | Rhododendron     | TRSH | 0.01        | 0.13        | 0.18        | 0.32        | <b>0.64</b> | 0.50        | 0.75        | -           | -           | -           | - |
| 158 | Rhus             | DWAR | 0.01        | -           | -           | -           | -           | -           | -           | -           | -           | -           | - |
| 159 | Robinia          | TRSH | 0.00        | -           | -           | -           | -           | -           | -           | -           | -           | -           | - |
| 160 | Rosaceae         | HERB | <b>0.62</b> | 0.00        | <b>0.50</b> | 0.36        | 0.36        | 0.60        | 0.74        | 0.75        | 0.94        | 0.95        | - |
| 161 | Rubiaceae        | TRSH | 0.18        | 0.12        | 0.34        | 0.31        | 0.41        | 0.46        | 0.67        | 0.78        | 0.81        | <b>0.60</b> | - |
| 162 | Rumex            | HERB | <b>0.36</b> | 0.08        | 0.18        | 0.41        | 0.47        | 0.41        | 0.70        | 0.71        | 0.86        | 0.97        | - |
| 163 | Rutaceae         | HERB | 0.00        | -           | -           | -           | -           | -           | -           | -           | -           | -           | - |
| 164 | Salix            | TRSH | <b>0.37</b> | 0.22        | 0.12        | 0.36        | 0.43        | 0.59        | 0.62        | 0.79        | 0.84        | <b>0.50</b> | - |
| 165 | Sambucus         | TRSH | 0.04        | 0.11        | 0.17        | 0.40        | 0.56        | 0.50        | -           | -           | -           | -           | - |
| 166 | Santalaceae      | SUCC | 0.03        | -           | -           | -           | -           | -           | -           | -           | -           | -           | - |
| 167 | Sapotaceae       | TRSH | 0.00        | 0.00        | -           | -           | -           | -           | <b>0.00</b> | -           | <b>0.09</b> | -           | - |
| 168 | Saxifragaceae    | TRSH | 0.08        | -           | -           | -           | -           | -           | -           | -           | -           | -           | - |
| 169 | Scrophulariaceae | PALM | 0.07        | 0.20        | -           | -           | -           | -           | -           | -           | -           | -           | - |
| 170 | Smilacaceae      | HERB | 0.00        | -           | -           | -           | -           | -           | -           | -           | -           | -           | - |
| 171 | Solanaceae       | TRSH | 0.04        | -           | -           | -           | -           | -           | -           | -           | -           | -           | - |
| 172 | Sorbus           | HERB | 0.03        | 0.15        | 0.23        | 0.22        | 0.48        | <b>0.73</b> | -           | -           | -           | -           | - |

|     |                |      |      |      |             |             |             |      |             |      |             |             |
|-----|----------------|------|------|------|-------------|-------------|-------------|------|-------------|------|-------------|-------------|
| 173 | Styrax         | HERB | 0.01 | -    | -           | -           | -           | -    | -           | -    | -           | -           |
| 174 | Syringa        | TRSH | 0.00 | -    | -           | -           | -           | -    | -           | -    | -           | -           |
| 175 | Tamaricaceae   | HERB | 0.00 | -    | -           | -           | -           | -    | -           | -    | -           | -           |
| 176 | Tamarix        | HERB | 0.03 | -    | -           | -           | -           | -    | -           | -    | -           | -           |
| 177 | Taxus          | HERB | 0.03 | -    | -           | -           | -           | -    | -           | -    | -           | -           |
| 178 | Thalictrum     | TRSH | 0.06 | 0.11 | 0.15        | 0.29        | <b>0.64</b> | 0.53 | <b>0.00</b> | -    | -           | -           |
| 179 | Thymelaeaceae  | HERB | 0.05 | -    | -           | -           | -           | -    | -           | -    | -           | -           |
| 180 | Tilia          | HERB | 0.06 | 0.10 | 0.23        | 0.32        | 0.54        | 0.53 | 0.59        | 0.64 | <b>0.63</b> | <b>0.78</b> |
| 181 | Tofieldiaceae  | HERB | 0.00 | -    | -           | -           | -           | -    | -           | -    | -           | -           |
| 182 | Trachycarpus   | HERB | 0.00 | -    | -           | -           | -           | -    | -           | -    | -           | -           |
| 183 | Tsuga          | TRSH | 0.00 | 0.00 | -           | -           | -           | -    | -           | -    | -           | -           |
| 184 | Ulmus          | TRSH | 0.20 | 0.12 | 0.23        | 0.31        | 0.49        | 0.55 | 0.62        | 0.77 | 1.00        | -           |
| 185 | Urticaceae     | HERB | 0.14 | 0.14 | 0.22        | 0.30        | 0.51        | 0.65 | 0.63        | 0.71 | 0.82        | -           |
| 186 | Valerianaceae  | HERB | 0.01 | -    | -           | -           | -           | -    | -           | -    | -           | -           |
| 187 | Verbenaceae    | TRSH | 0.00 | -    | -           | -           | -           | -    | -           | -    | -           | -           |
| 188 | Viburnum       | TRSH | 0.04 | 0.11 | -           | -           | -           | -    | -           | -    | -           | -           |
| 189 | Vinca          | TRSH | 0.00 | -    | -           | -           | -           | -    | -           | -    | -           | -           |
| 190 | Violaceae      | TRSH | 0.02 | -    | -           | -           | -           | -    | -           | -    | -           | -           |
| 191 | Vitaceae       | TRSH | 0.09 | -    | -           | -           | -           | -    | -           | -    | -           | -           |
| 192 | Vitex          | TRSH | 0.00 | -    | -           | -           | -           | -    | -           | -    | -           | -           |
| 193 | Ziziphus       | HERB | 0.00 | 0.00 | -           | -           | -           | -    | -           | -    | -           | -           |
| 194 | Zygophyllaceae | HERB | 0.01 | 0.00 | <b>0.00</b> | <b>0.80</b> | <b>0.00</b> | -    | -           | -    | -           | -           |

**Bold probability values** = occurrence probability outside the predicted probability range for more than 0.1

" - " = no predictions corresponding to the class.

**Group ID names :**

TRSH = Trees & Shrubs

UPHE = Upland herbs

HERB = Herbs

DWAR = Dwarf shrubs

LIAN = Liana
